# Supplementary material for: Dispirooxindole-β-Lactams: Synthesis via Staudinger Ketene-Imine Cycloaddition and Biological Evaluation
Source: MDPI journal article supplement (doi:10.3390/ijms23126666), 2022-06-15
Supplement: s1 [file s1]

## Supporting Information

# Dispirooxindole- $\beta$ -lactams: Synthesis via Staudinger ketene-imine cycloaddition and biological evaluation

Vadim E. Filatov <sup>1</sup>, Dmitrii A. Iuzabchuk <sup>1</sup>, Viktor A. Tafeenko <sup>1</sup>, Yuri K. Grishin <sup>1</sup>, Vitaly A. Roznyatovsky, Dmitry A. Skvortsov, Ilya A. Osterman, Nikolai V. Zyk <sup>1</sup>, Elena K. Beloglazkina\*

*Department of Chemistry, Lomonosov Moscow State University, 119234 Moscow, Russian Federation*

### Table of contents

|                                                                                                                                  |    |
|----------------------------------------------------------------------------------------------------------------------------------|----|
| Spectral data .....                                                                                                              | 3  |
| 1-(4-methoxyphenyl)-2-oxopyrrolidine-3-carboxylic acid (3a).....                                                                 | 3  |
| 2-oxo-1-(p-tolyl)pyrrolidine-3-carboxylic acid (3b) .....                                                                        | 5  |
| 2-oxo-1-(m-tolyl)pyrrolidine-3-carboxylic acid (3c) .....                                                                        | 7  |
| 1-(4-chlorophenyl)-2-oxopyrrolidine-3-carboxylic acid (3d).....                                                                  | 9  |
| 1-(3-chloro-4-fluorophenyl)-2-oxopyrrolidine-3-carboxylic acid (3e).....                                                         | 11 |
| (3S*,3'S*)-1',1''-bis(4-methoxyphenyl)dispiro[indoline-3,2'-azetidine-3',3''-pyrrolidine]-2,2'',4'-trione (5a) .....             | 13 |
| (3S,3'S)-1',1''-bis(4-methoxyphenyl)-1-tosyldispiro[indoline-3,2'-azetidine-3',3''-pyrrolidine]-2,2'',4'-trione (6).....         | 18 |
| N,1-bis(4-methoxyphenyl)-2-oxopyrrolidine-3-carboxamide (7) .....                                                                | 19 |
| (3S,3'S)-1'-(4-methoxyphenyl)-1''-(p-tolyl)dispiro[indoline-3,2'-azetidine-3',3''-pyrrolidine]-2,2'',4'-trione (5b).....         | 20 |
| (3S,3'S)-1''-(4-chlorophenyl)-1'-(4-methoxyphenyl)dispiro[indoline-3,2'-azetidine-3',3''-pyrrolidine]-2,2'',4'-trione (5c) ..... | 22 |
| (3S,3'S)-1',1''-di-m-tolyldispiro[indoline-3,2'-azetidine-3',3''-pyrrolidine]-2,2'',4'-trione (5d) .....                         | 24 |
| (3S,3'S)-1''-(4-chlorophenyl)-1'-(m-tolyl)dispiro[indoline-3,2'-azetidine-3',3''-pyrrolidine]-2,2'',4'-trione (5e).....          | 26 |
| (3S,3'S)-1''-(3-chloro-4-fluorophenyl)-1'-(m-tolyl)dispiro[indoline-3,2'-azetidine-3',3''-pyrrolidine]-2,2'',4'-trione (5f)..... | 28 |
| X-Ray .....                                                                                                                      | 30 |

## Spectral data

### 1-(4-methoxyphenyl)-2-oxopyrrolidine-3-carboxylic acid (**3a**).

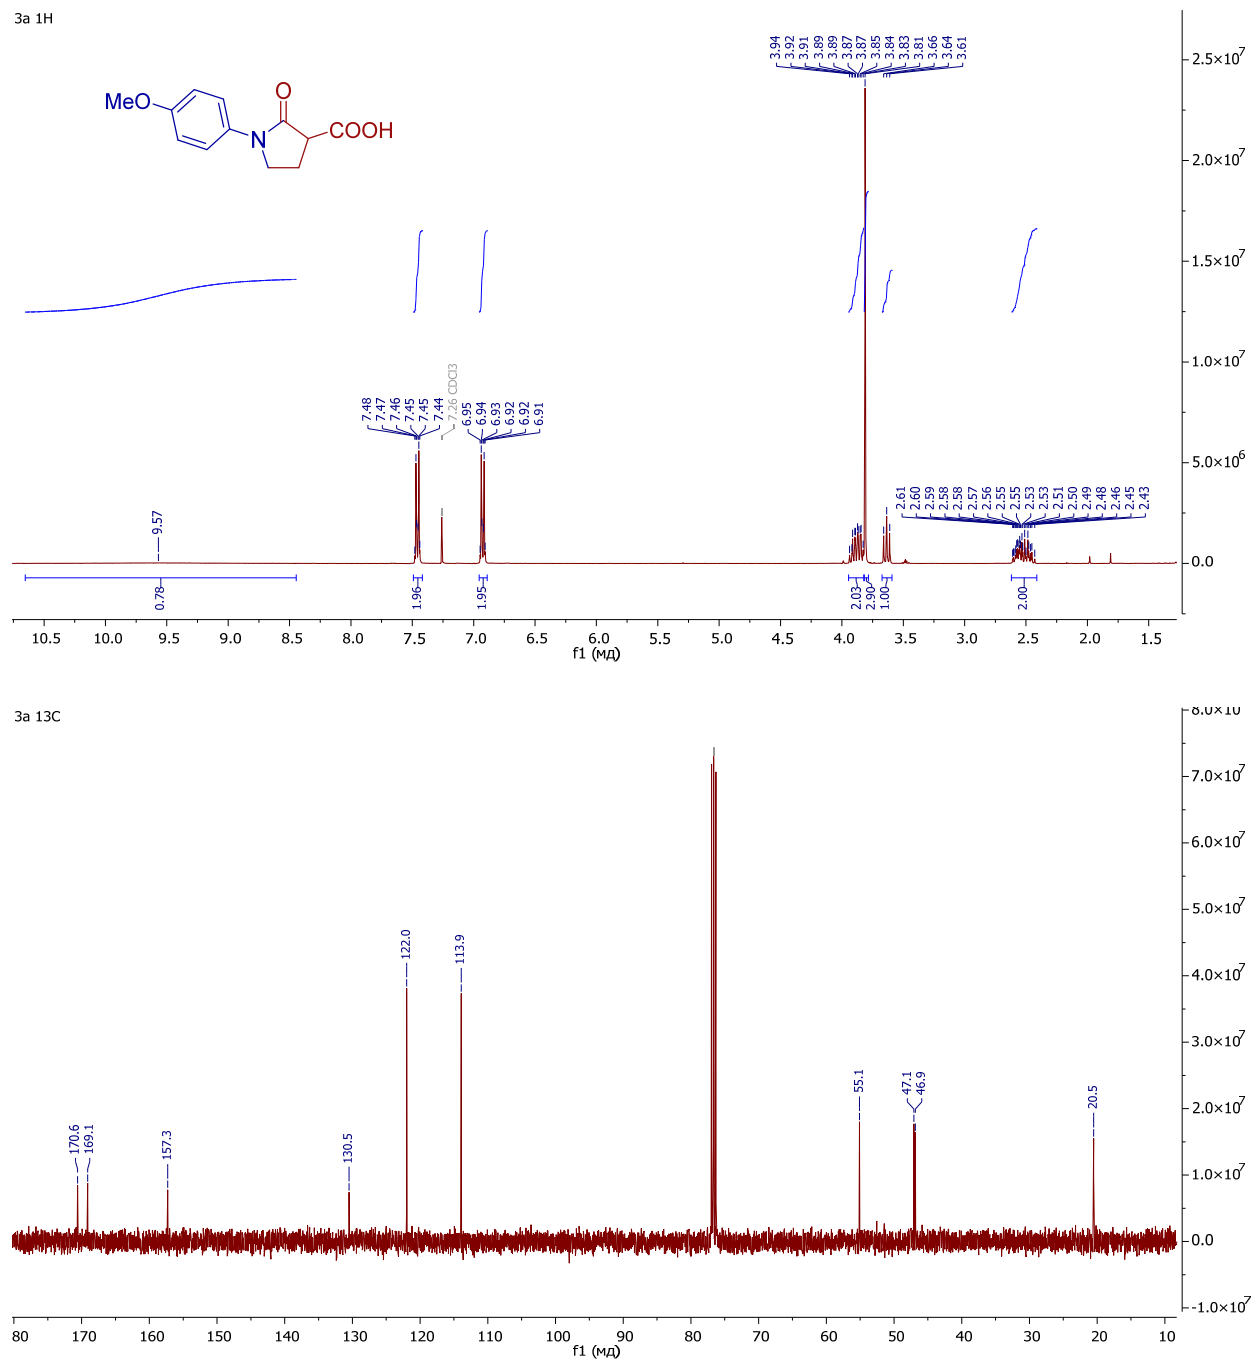

Figure S1

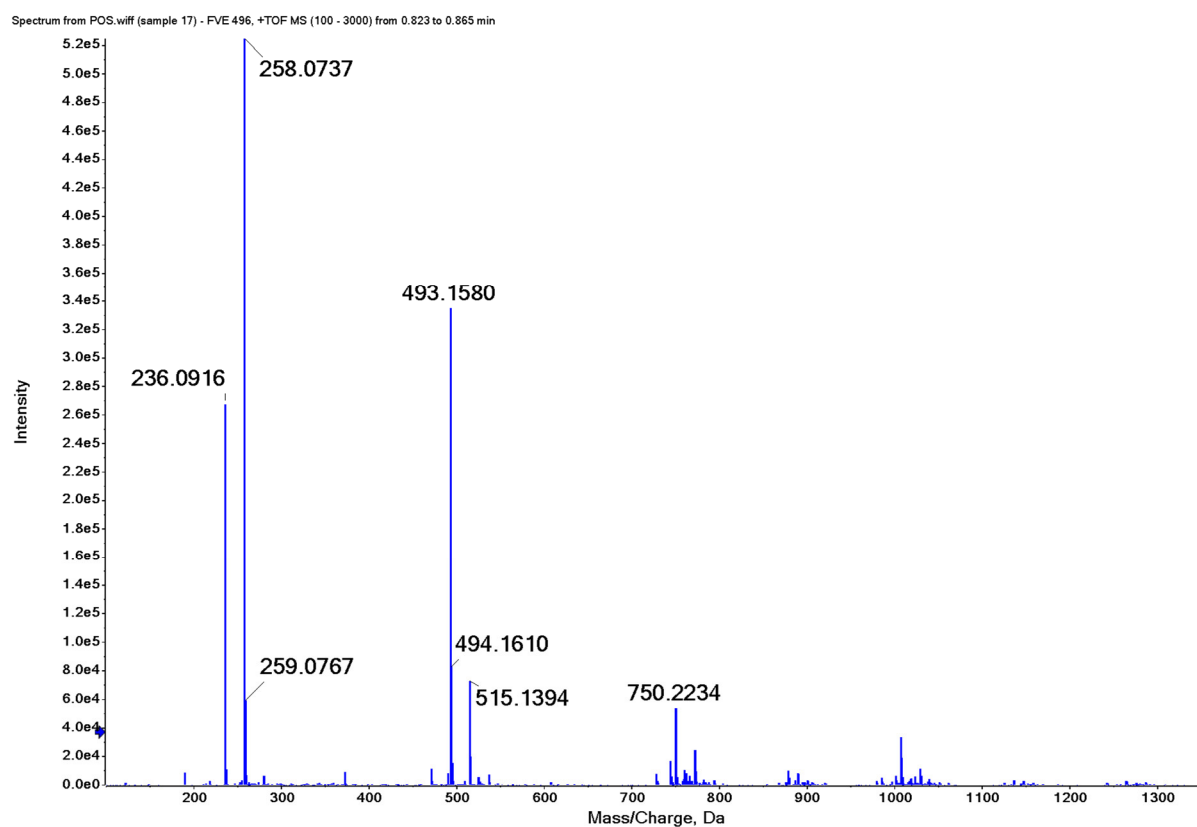

Figure S2

2-oxo-1-(*p*-tolyl)pyrrolidine-3-carboxylic acid (**3b**)

3b <sup>1</sup>H

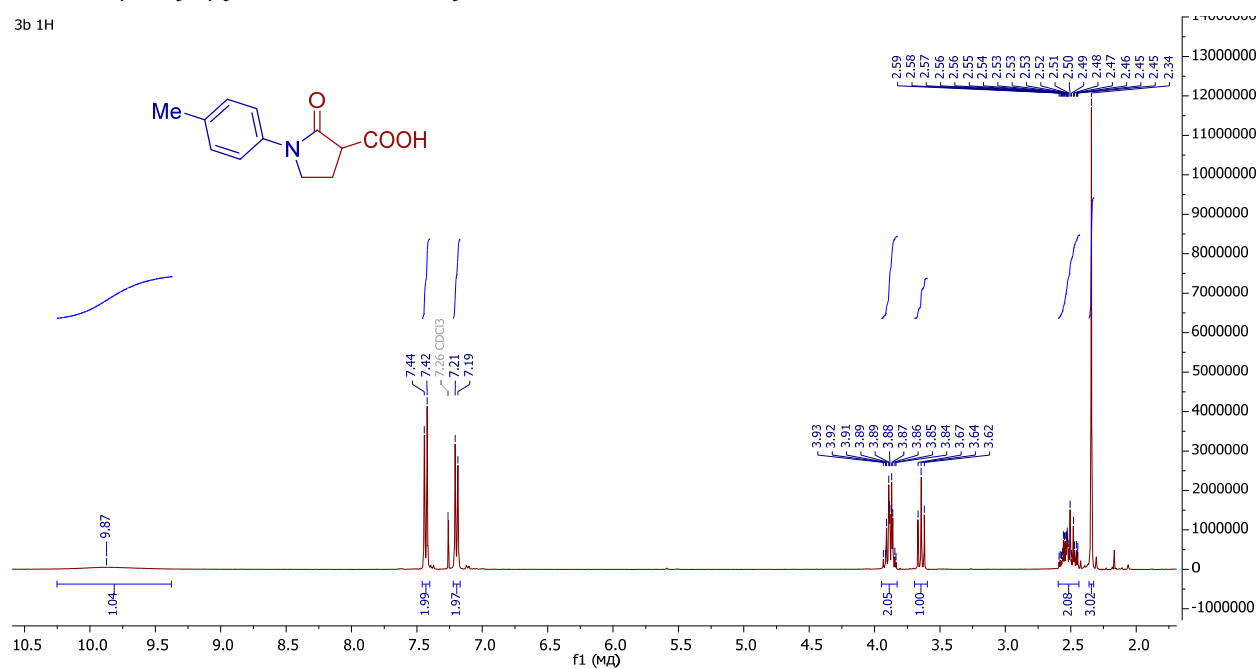

3b <sup>13</sup>C

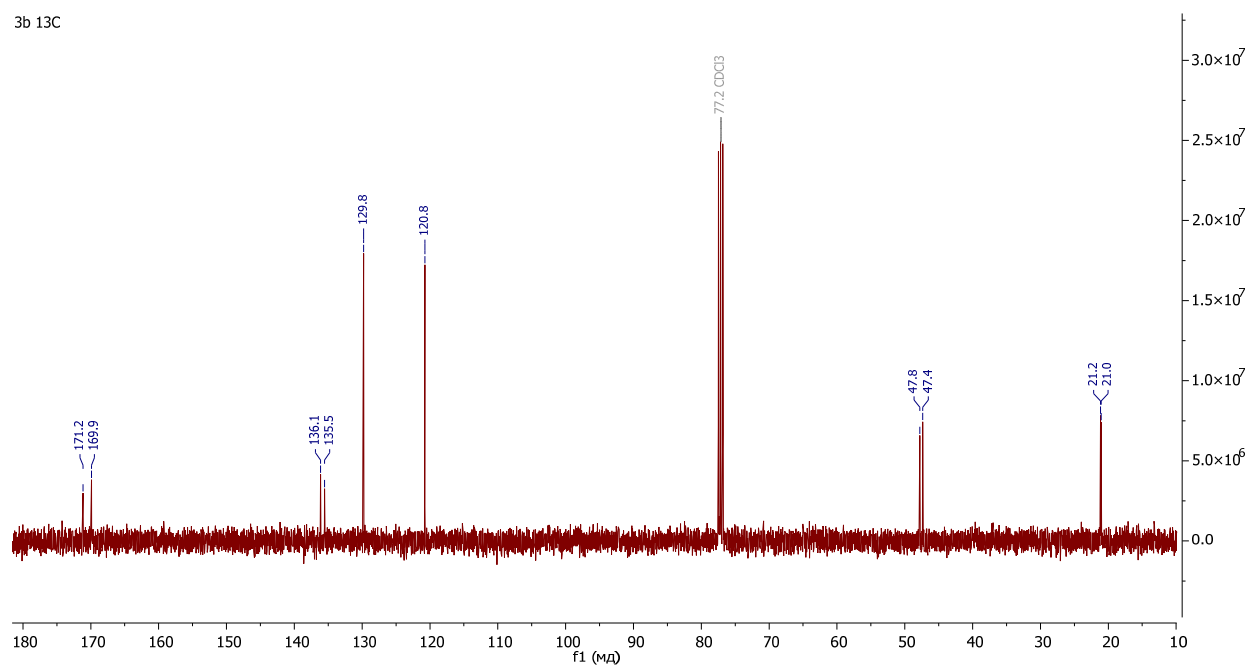

Figure S3

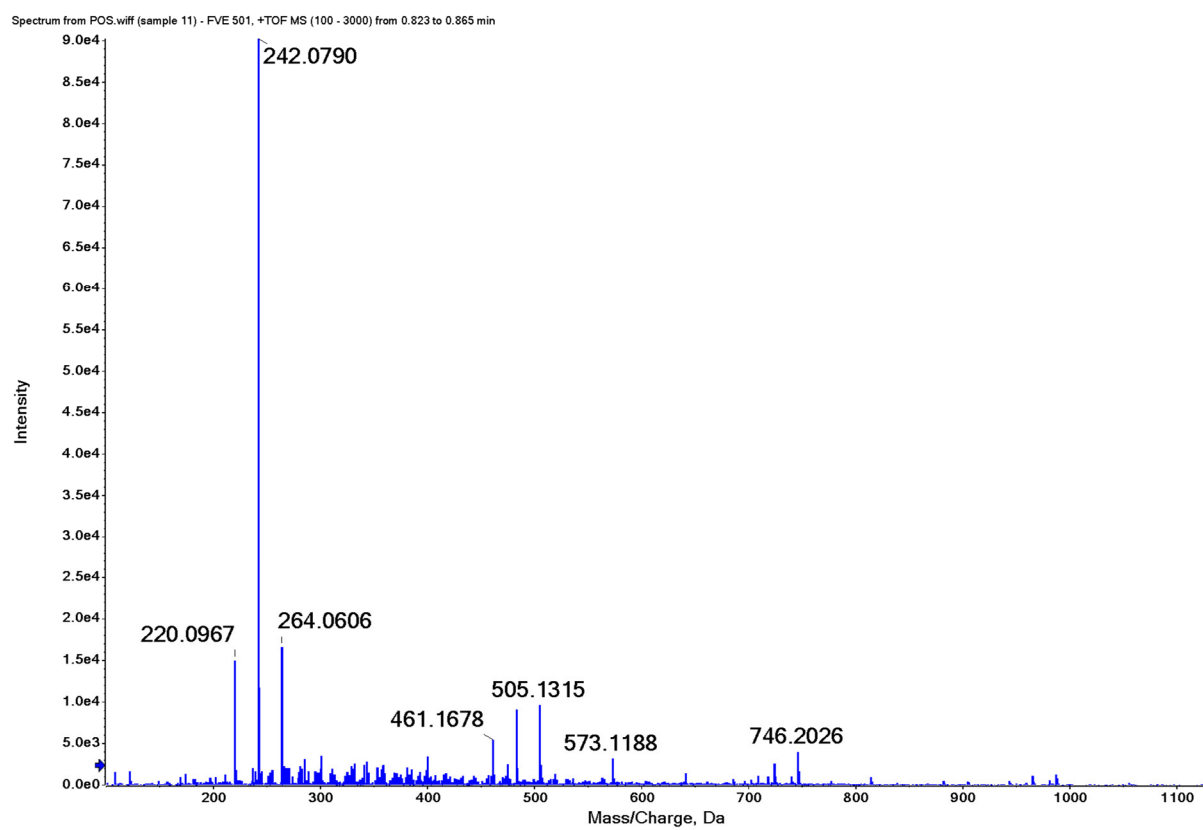

Figure S4

2-oxo-1-(*m*-tolyl)pyrrolidine-3-carboxylic acid (**3c**)

**3c** <sup>1</sup>H

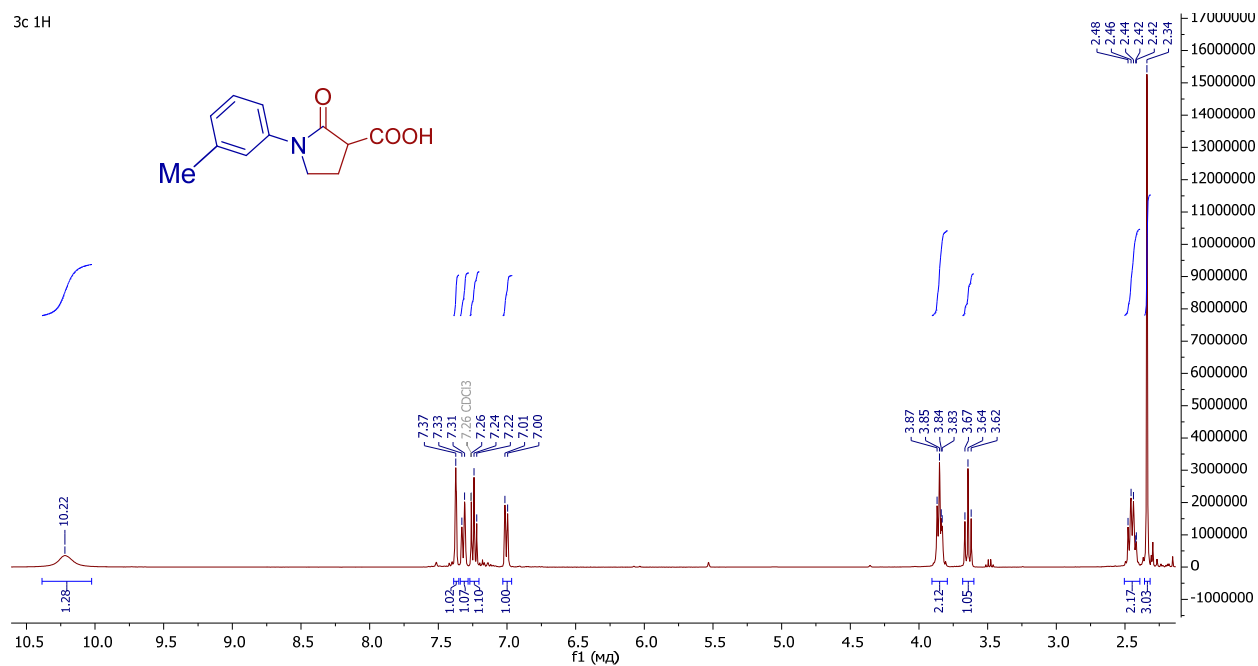

**3c** <sup>13</sup>C

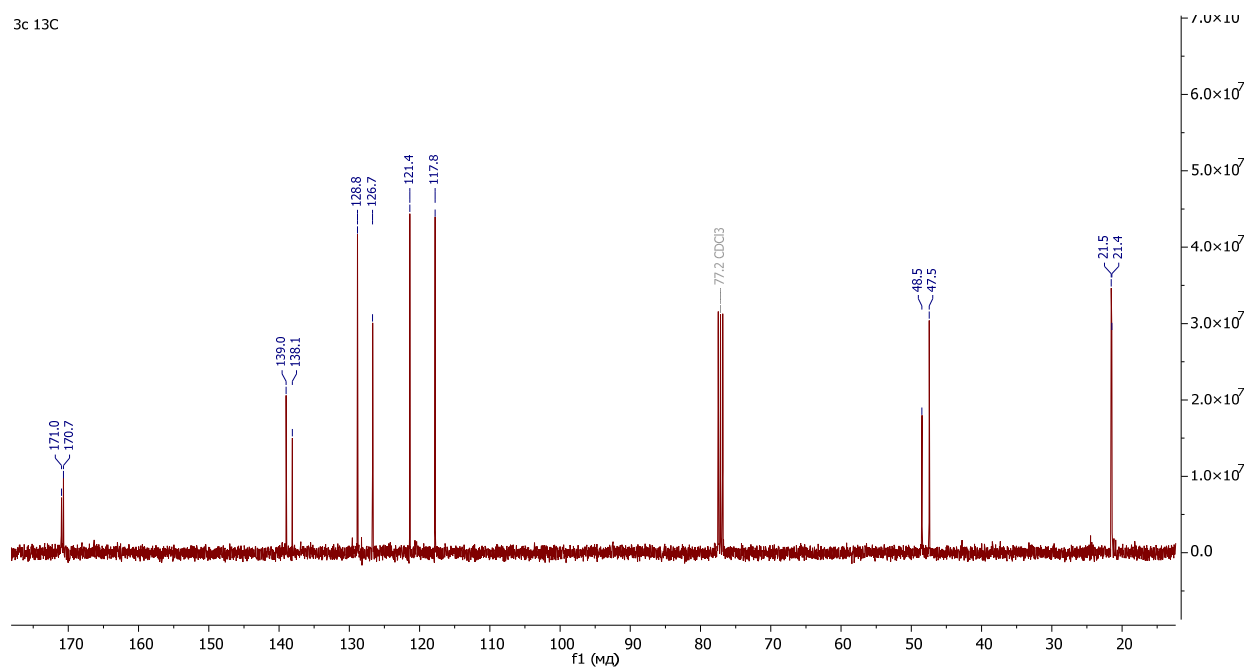

Figure S5

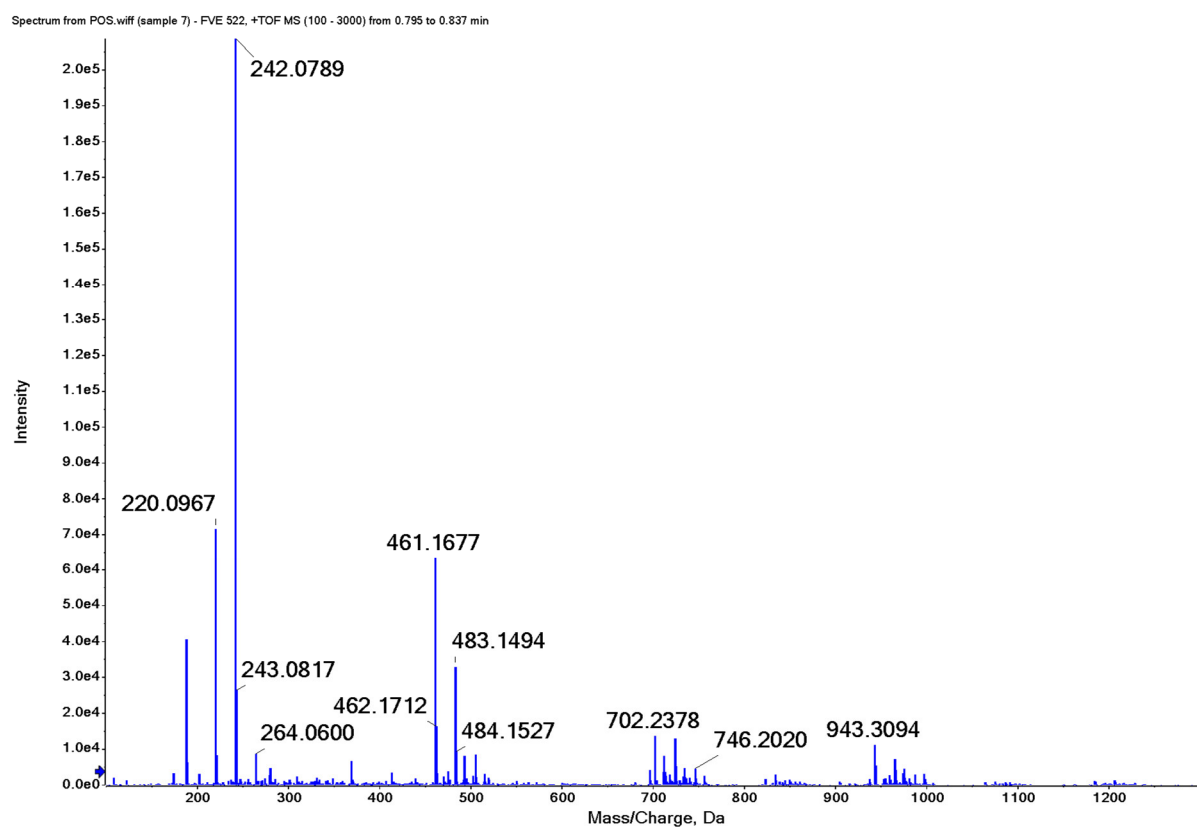

Figure S6

1-(4-chlorophenyl)-2-oxopyrrolidine-3-carboxylic acid (**3d**)

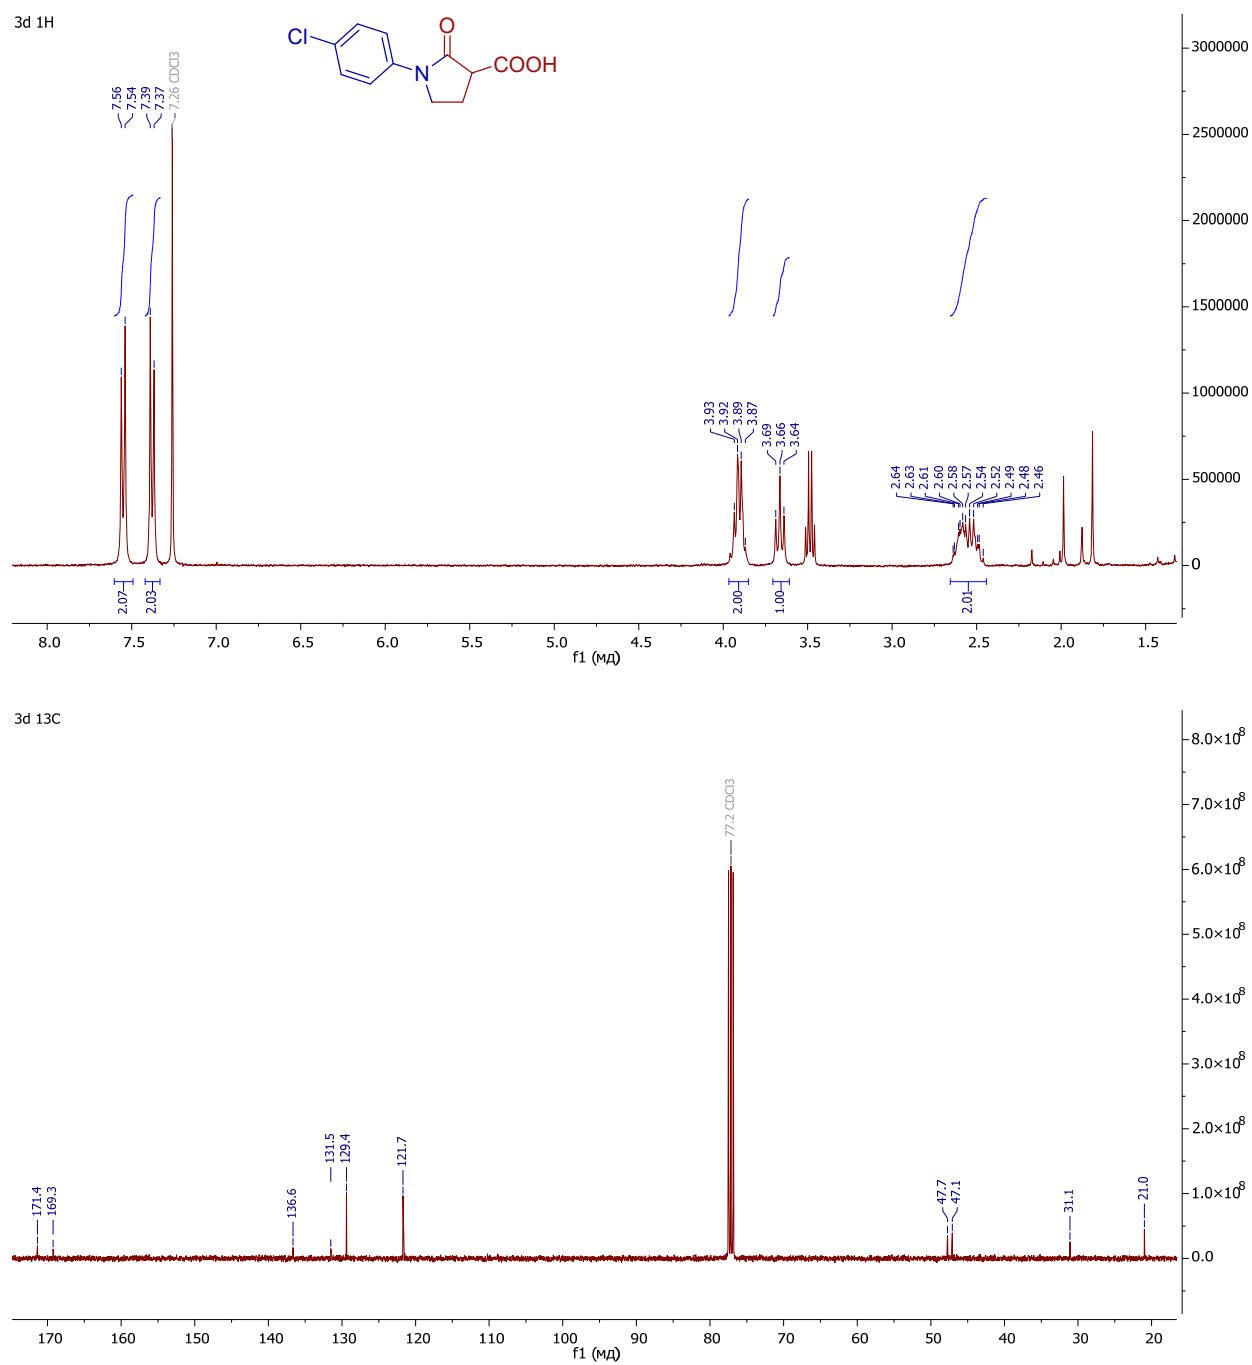

Figure S7



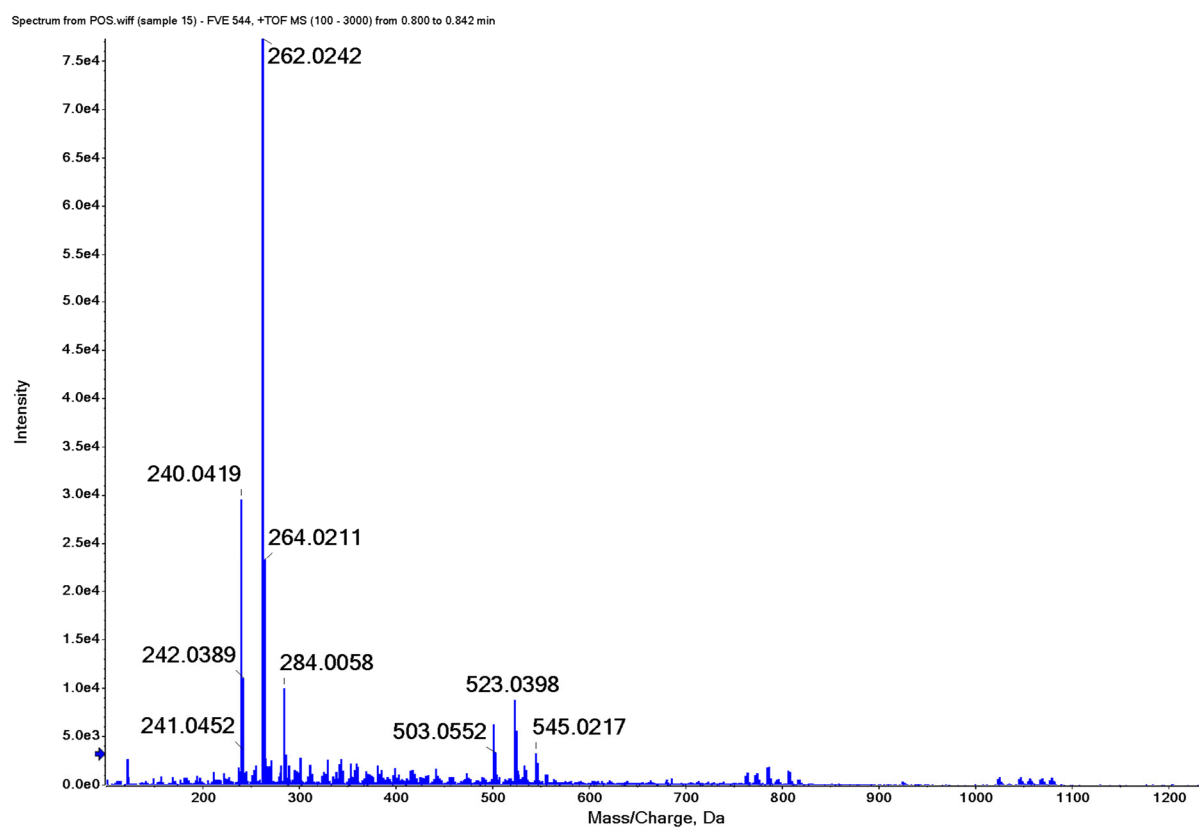

Figure S8

1-(3-chloro-4-fluorophenyl)-2-oxopyrrolidine-3-carboxylic acid (**3e**)

**3e** <sup>1</sup>H

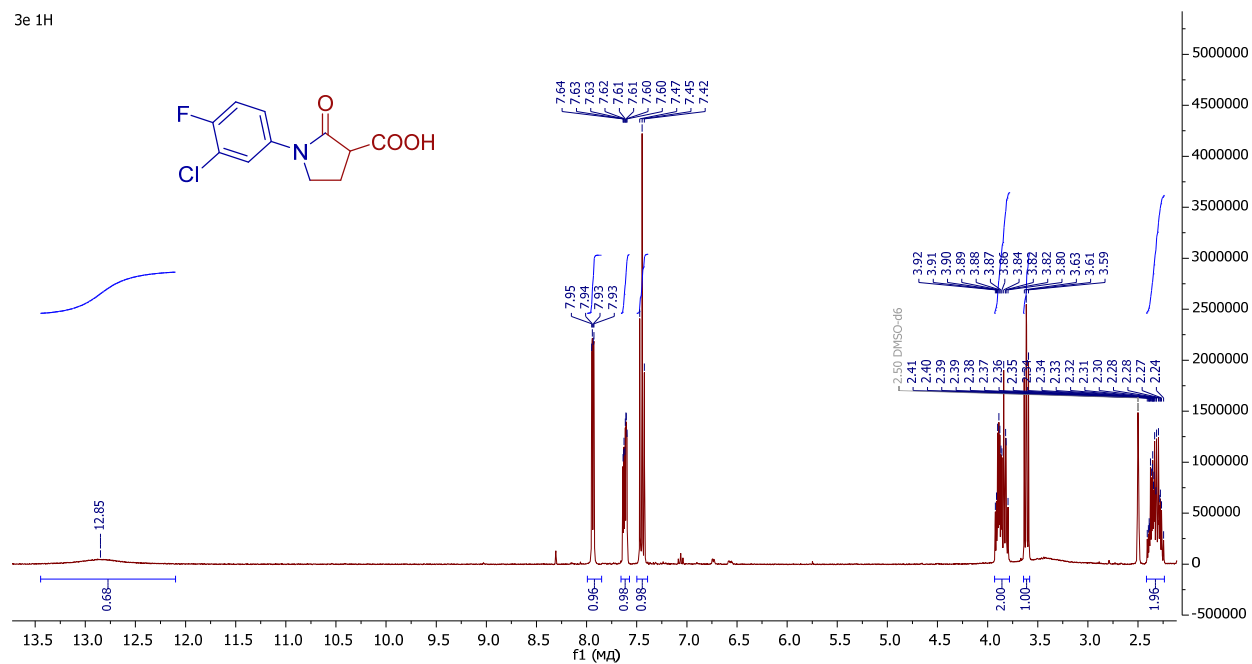

**3e** <sup>13</sup>C

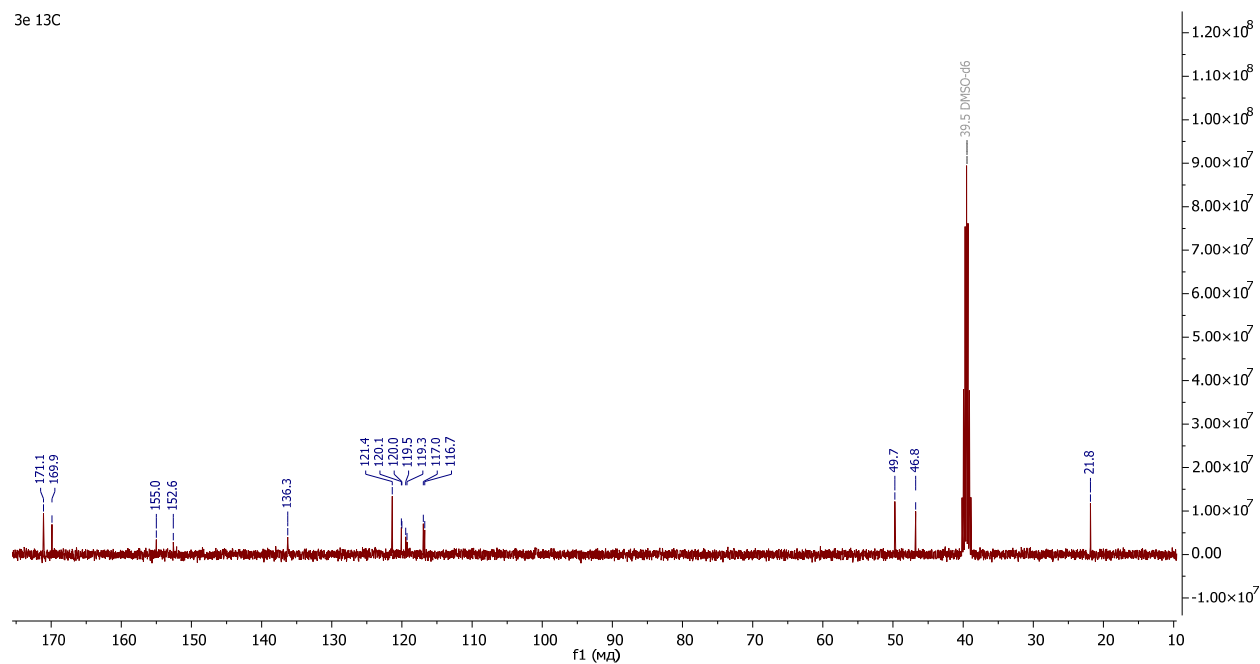

Figure S9

Spectrum from POS.wiff (sample 6) - FVE 521, +TOF MS (100 - 3000) from 0.795 to 0.837 min, subtracted by (Spectrum from POS.wiff (sample 6) - FVE 521, +TOF MS (100 - 3000) from 0.623 to 0.697 min)

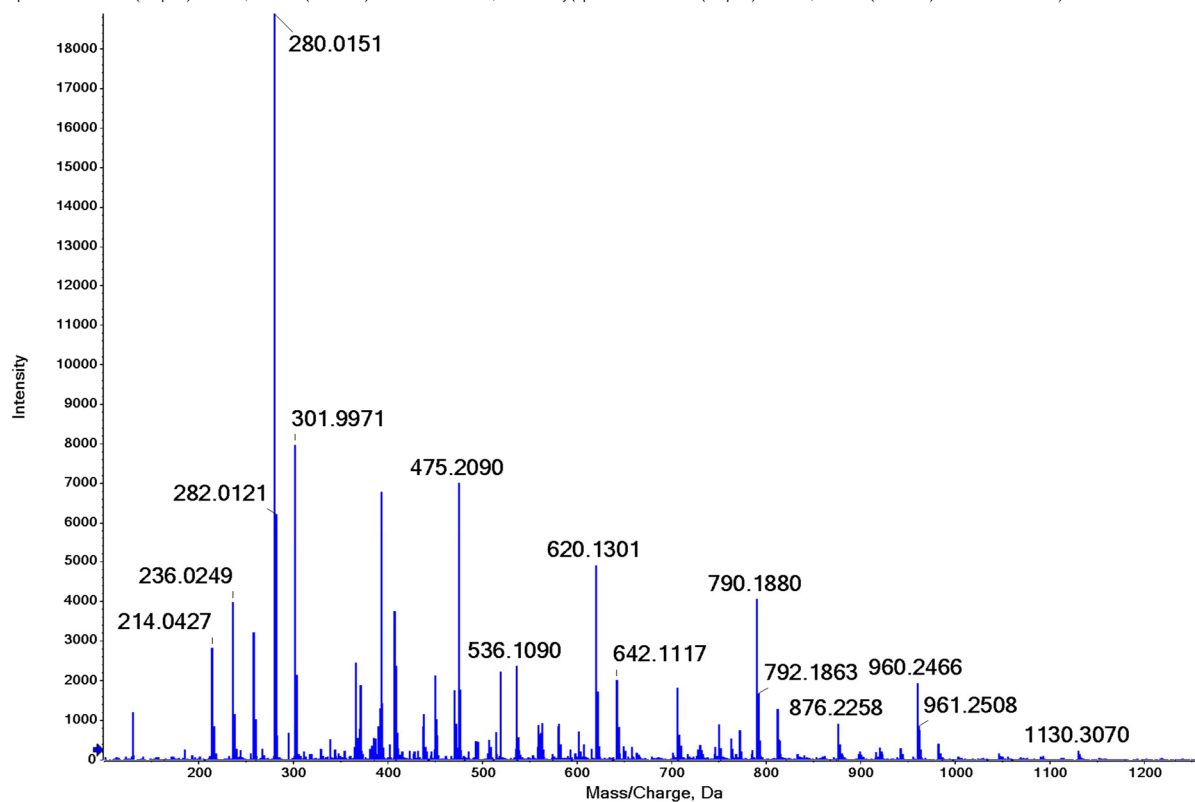

Spectrum from POS.wiff (sample 6) - FVE 521, +TOF MS (100 - 3000) from 0.795 to 0.837 min, subtracted by (Spectrum from POS.wiff (sample 6) - FVE 521, +TOF MS (100 - 3000) from 0.623 to 0.697 min)

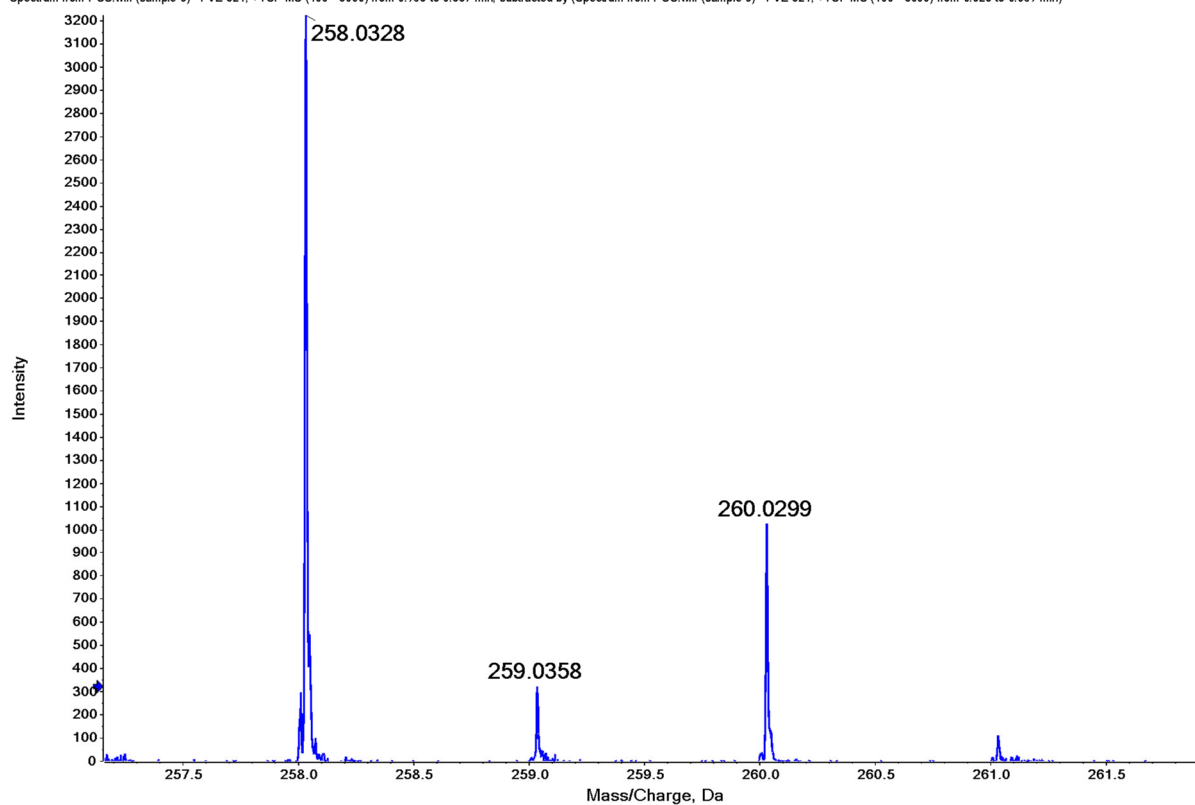

Figure S10

**5a** <sup>1</sup>H

Chemical structure of **5a** is shown above the spectrum.

<sup>1</sup>H NMR spectrum (DMSO-d<sub>6</sub>) of **5a** (molar mass 354.34 g/mol) is displayed below. The x-axis represents the chemical shift in ppm (δ), ranging from 11.5 to 2.5. The y-axis represents the intensity in arbitrary units (a.u.).

Key peaks and integrations are summarized in the table below:

| Chemical Shift (ppm) | Integration |
|----------------------|-------------|
| 11.24 (s, 1H)        | 1.03        |
| 7.37-7.32 (m, 6H)    | 1.00        |
| 7.01-7.00 (m, 2H)    | 2.96        |
| 6.89-6.86 (m, 4H)    | 7.91        |
| 3.80 (s, 3H)         | 1.15        |
| 3.53 (s, 3H)         | 2.95        |
| 3.67 (s, 3H)         | 2.80        |
| 3.55 (s, 3H)         | 1.07        |
| 3.51 (s, 3H)         | 2.59        |
| 3.50 (s, 3H)         | 2.58        |
| 3.49 (s, 3H)         | 2.57        |
| 2.55 (s, 3H)         | 2.56        |
| 2.53 (s, 3H)         | 2.55        |
| 2.50 (s, 3H)         | 1.18        |
| 2.50 (s, 3H)         | 1.11        |

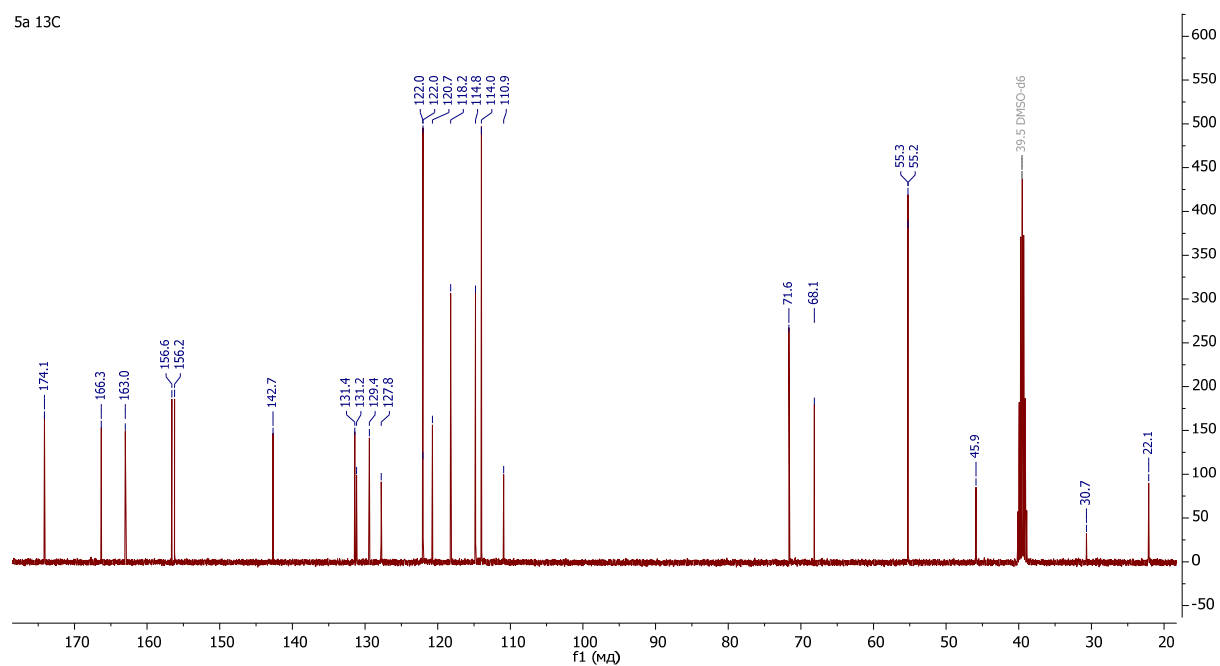

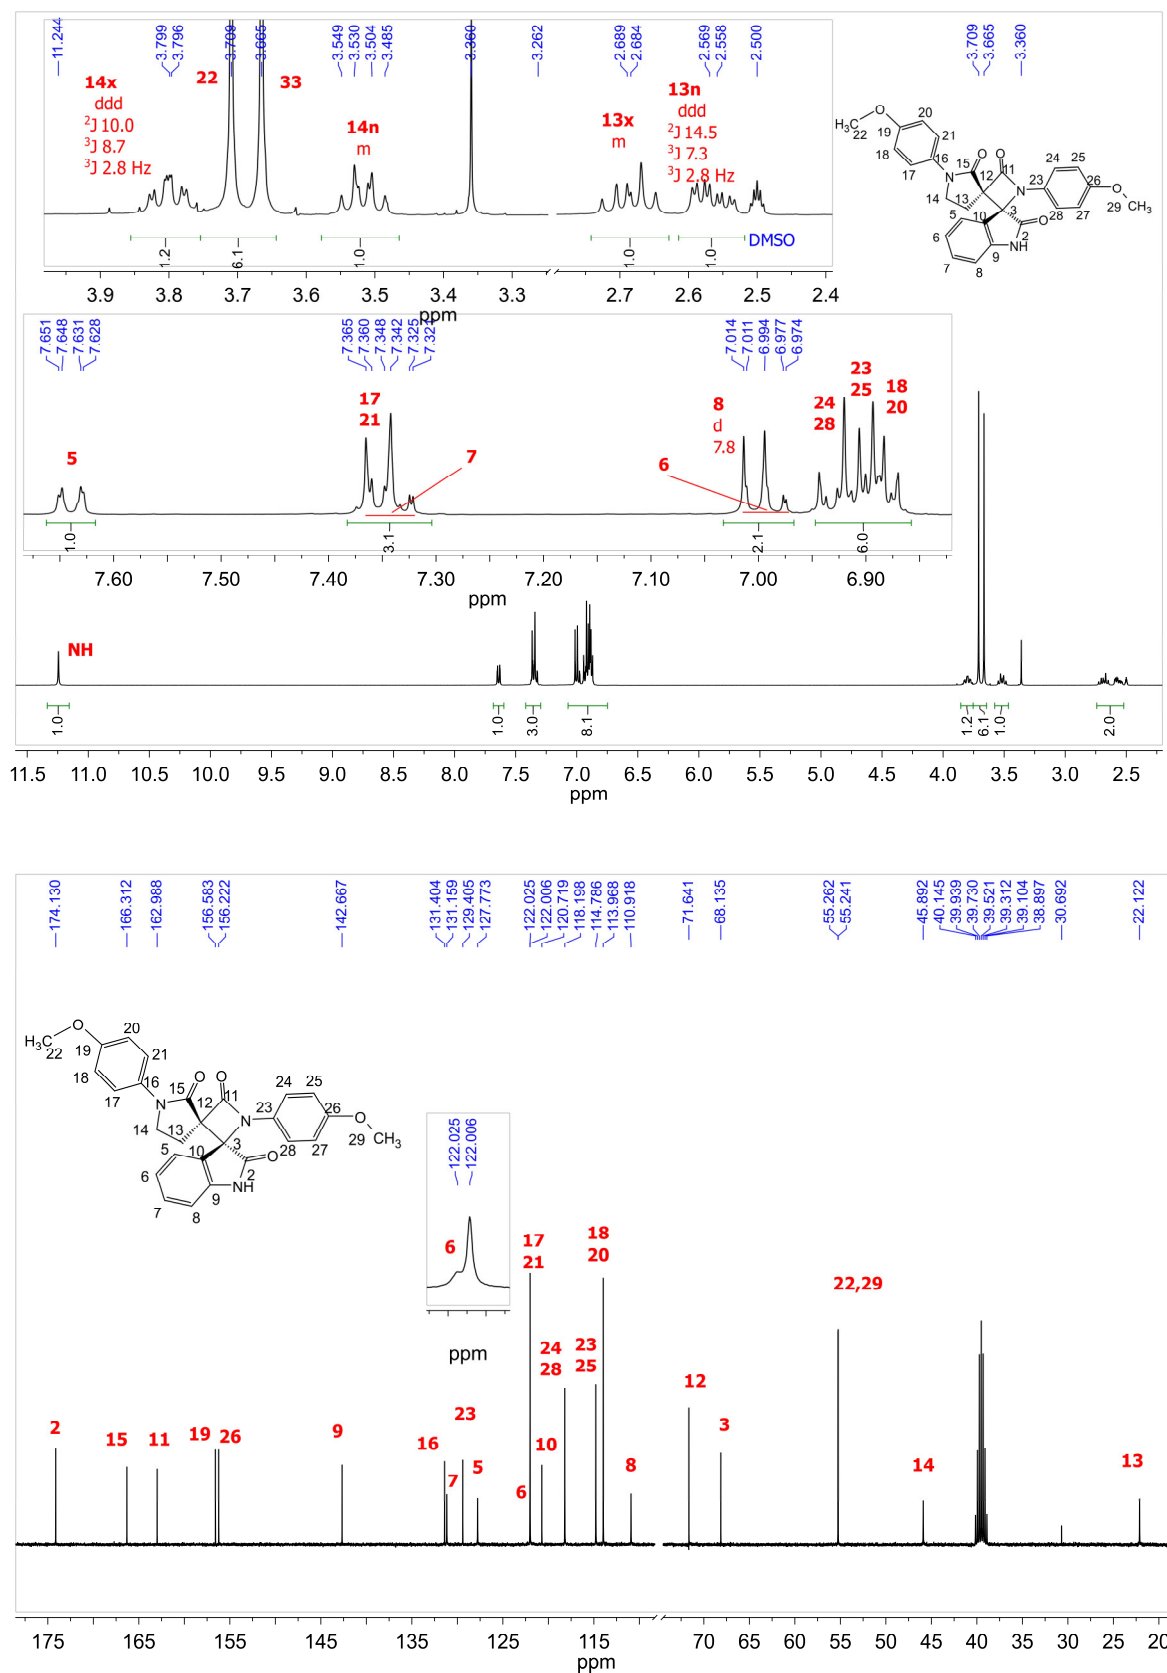

Figure S12

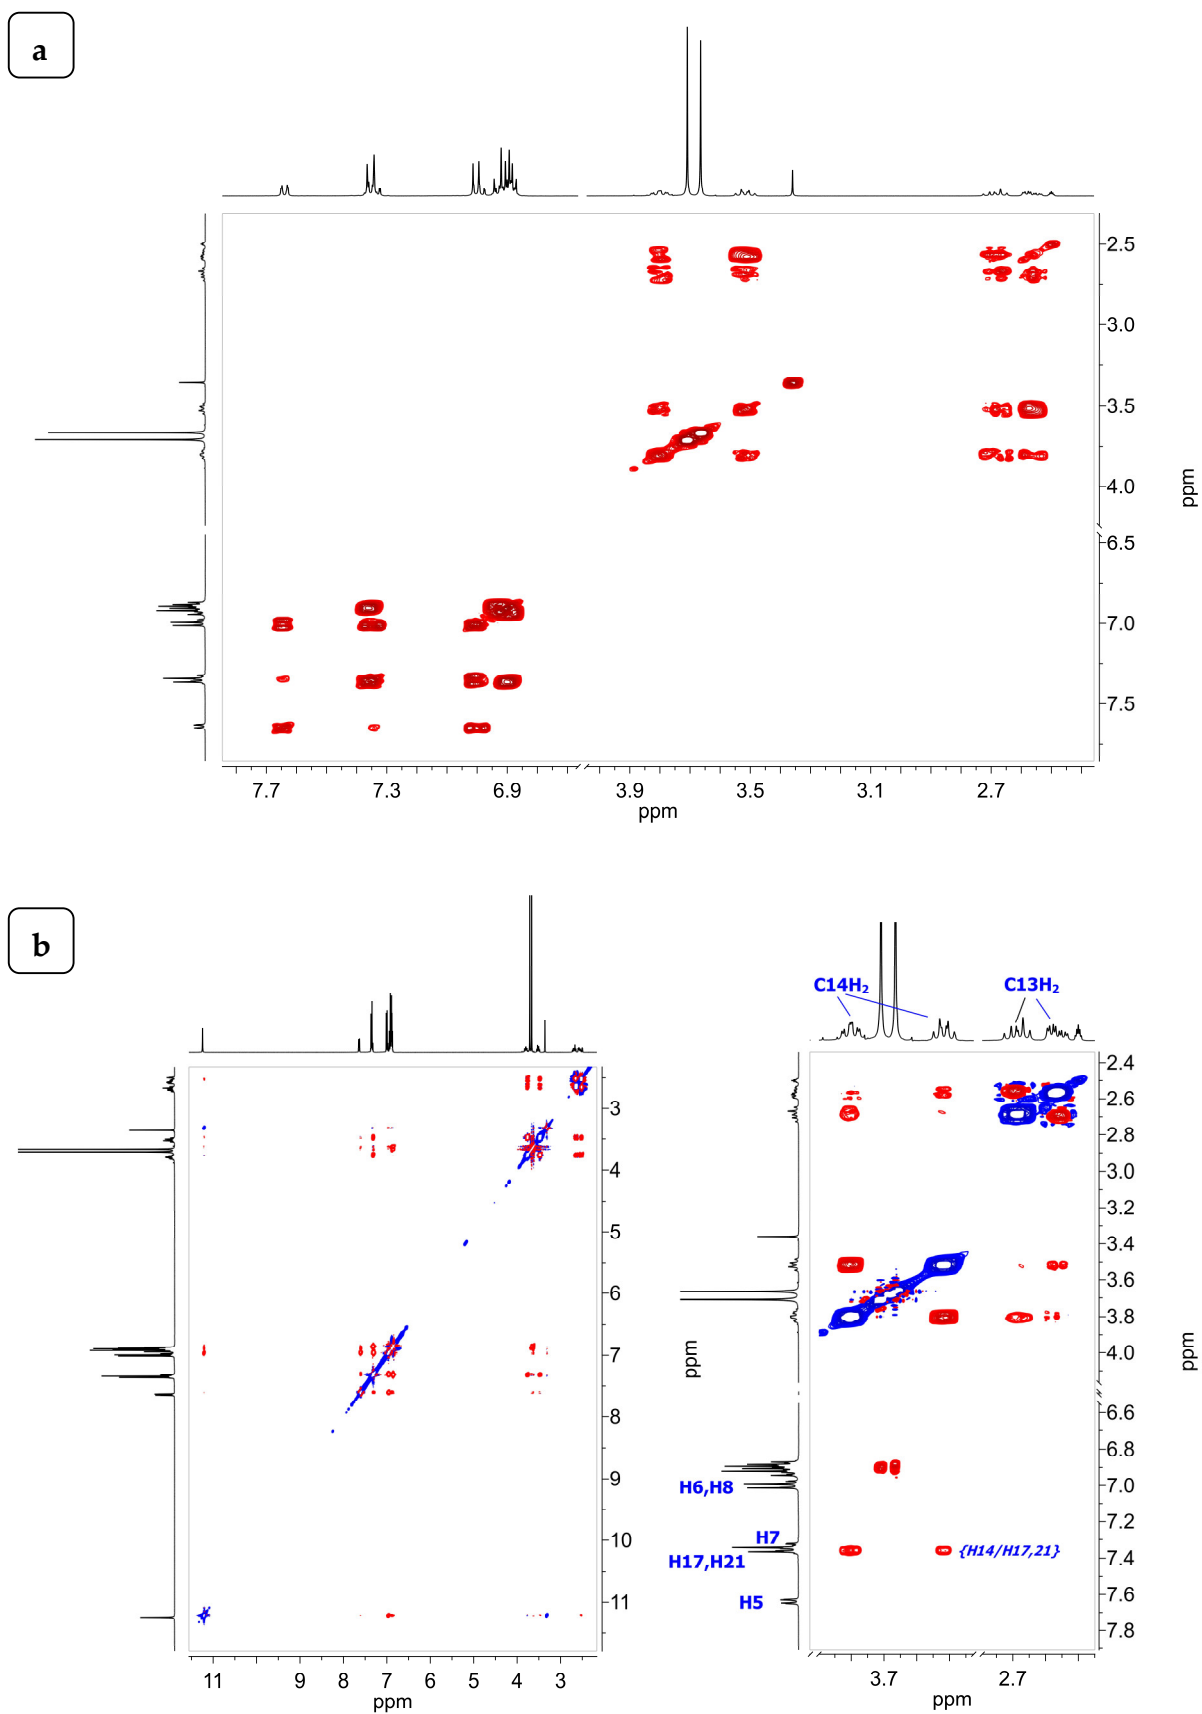

Figure S13: (a) gCOSY; (b)ROESYAD)

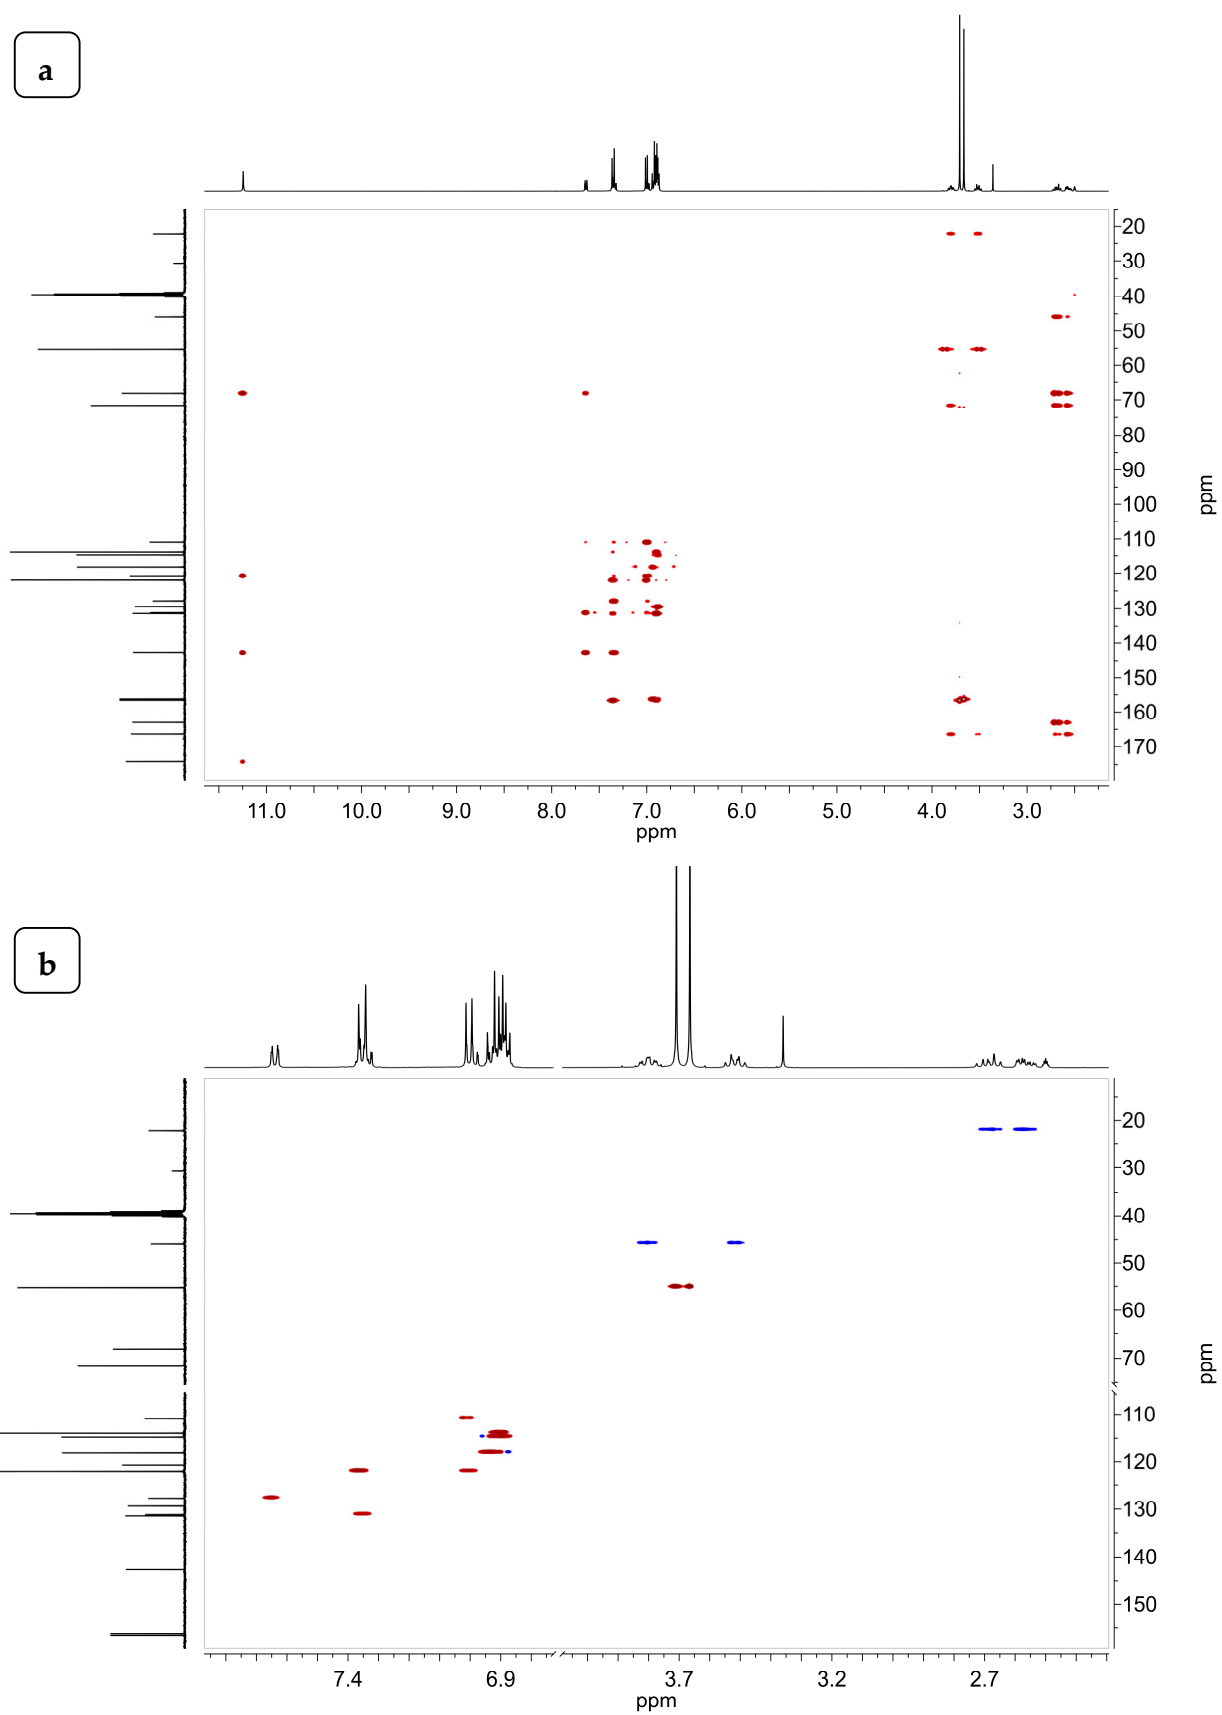

Figure S14: (a) gHSQCAD; (b)gHMBCAD

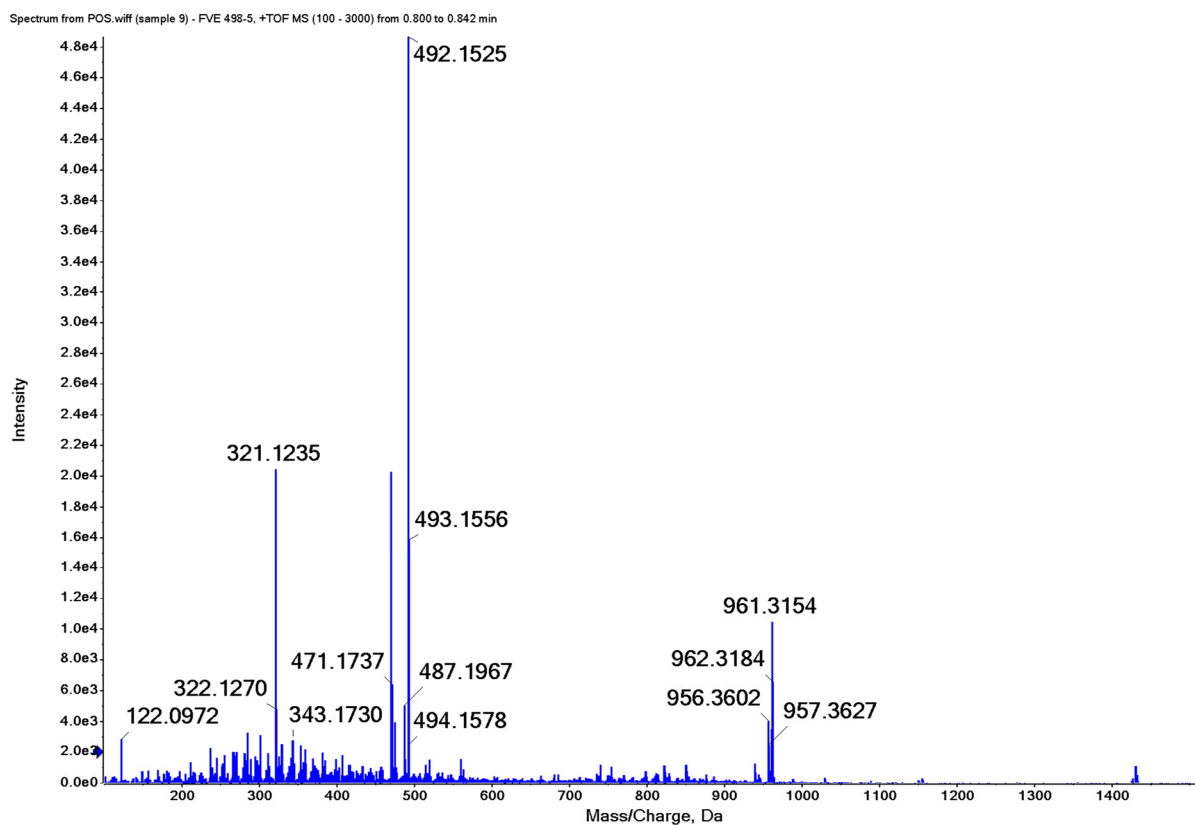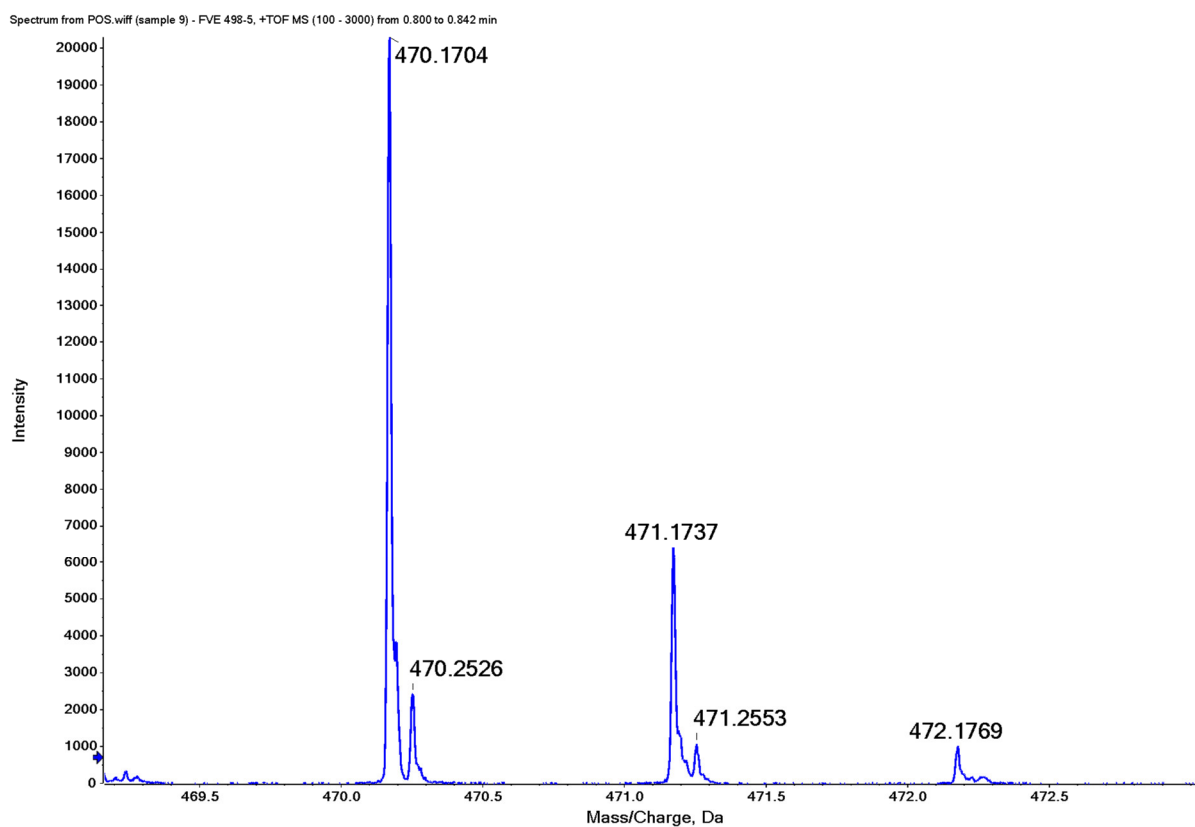

Figure S15



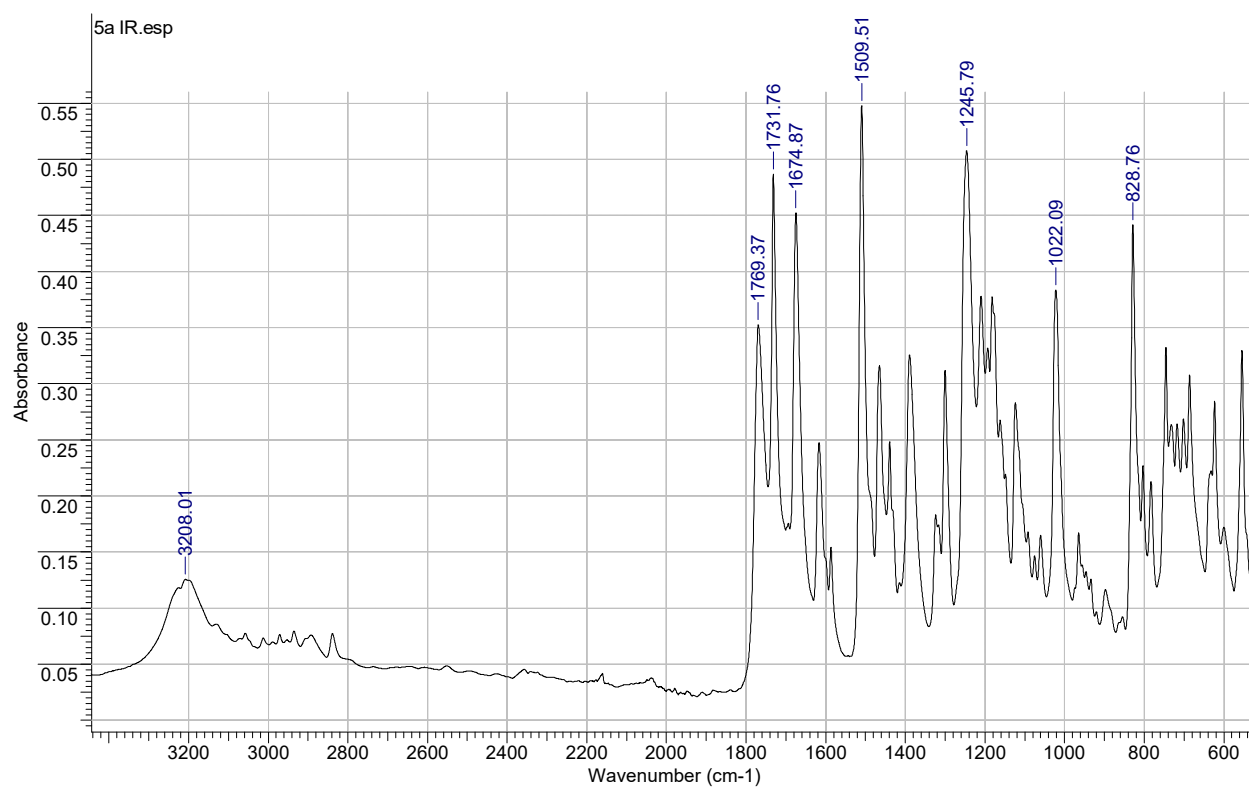

Figure S16

(3*S*,3'*S*)-1',1''-bis(4-methoxyphenyl)-1-tosylspiro[indoline-3,2'-azetidine-3',3''-pyrrolidine]-2,2'',4'-trione (6)

6 1H

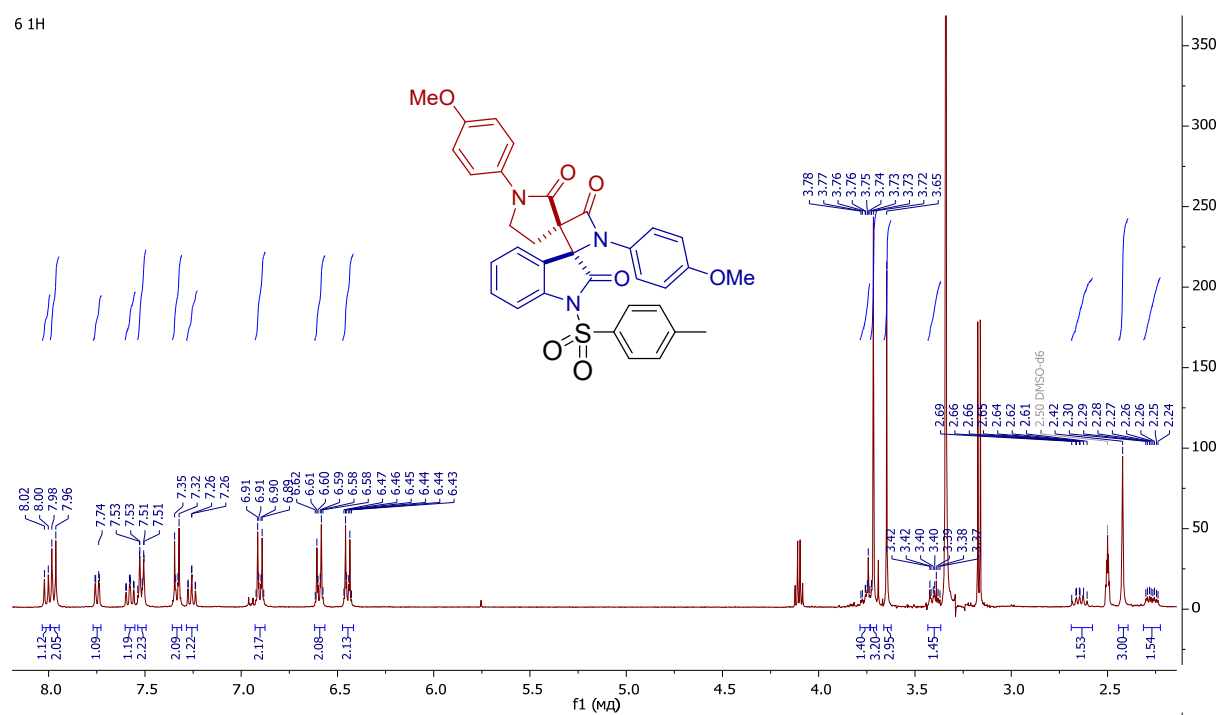

6 13C

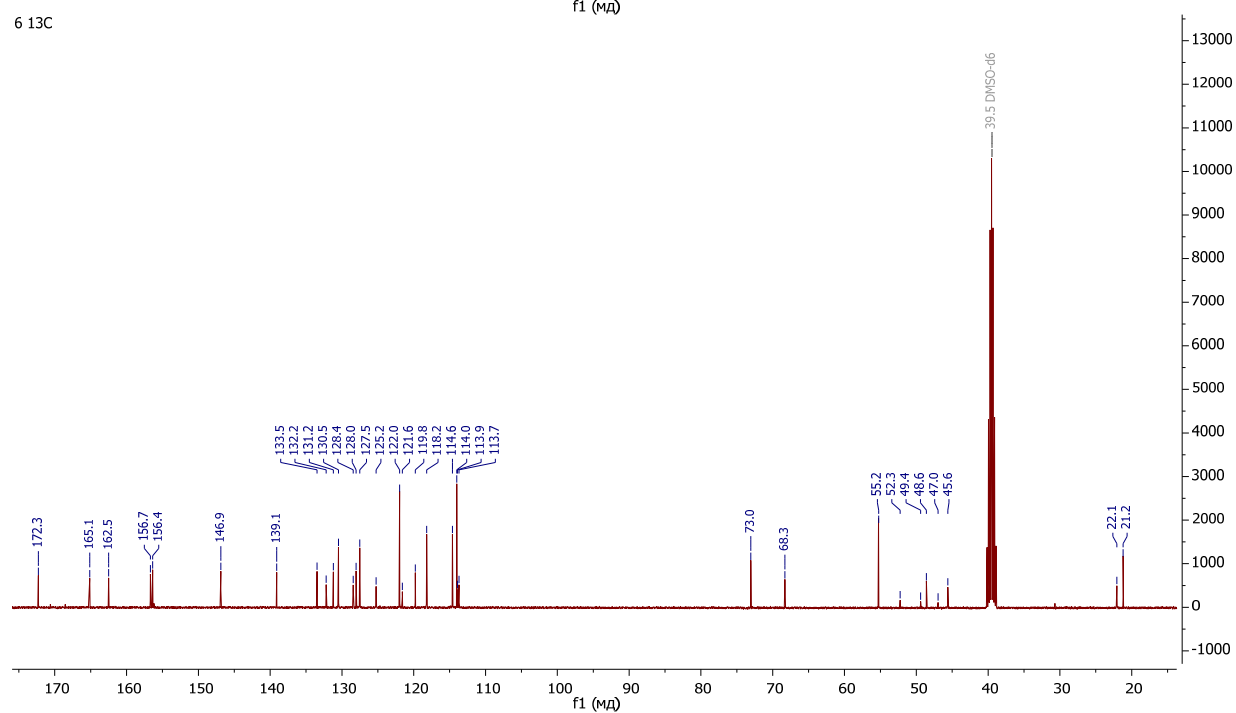

Figure S17

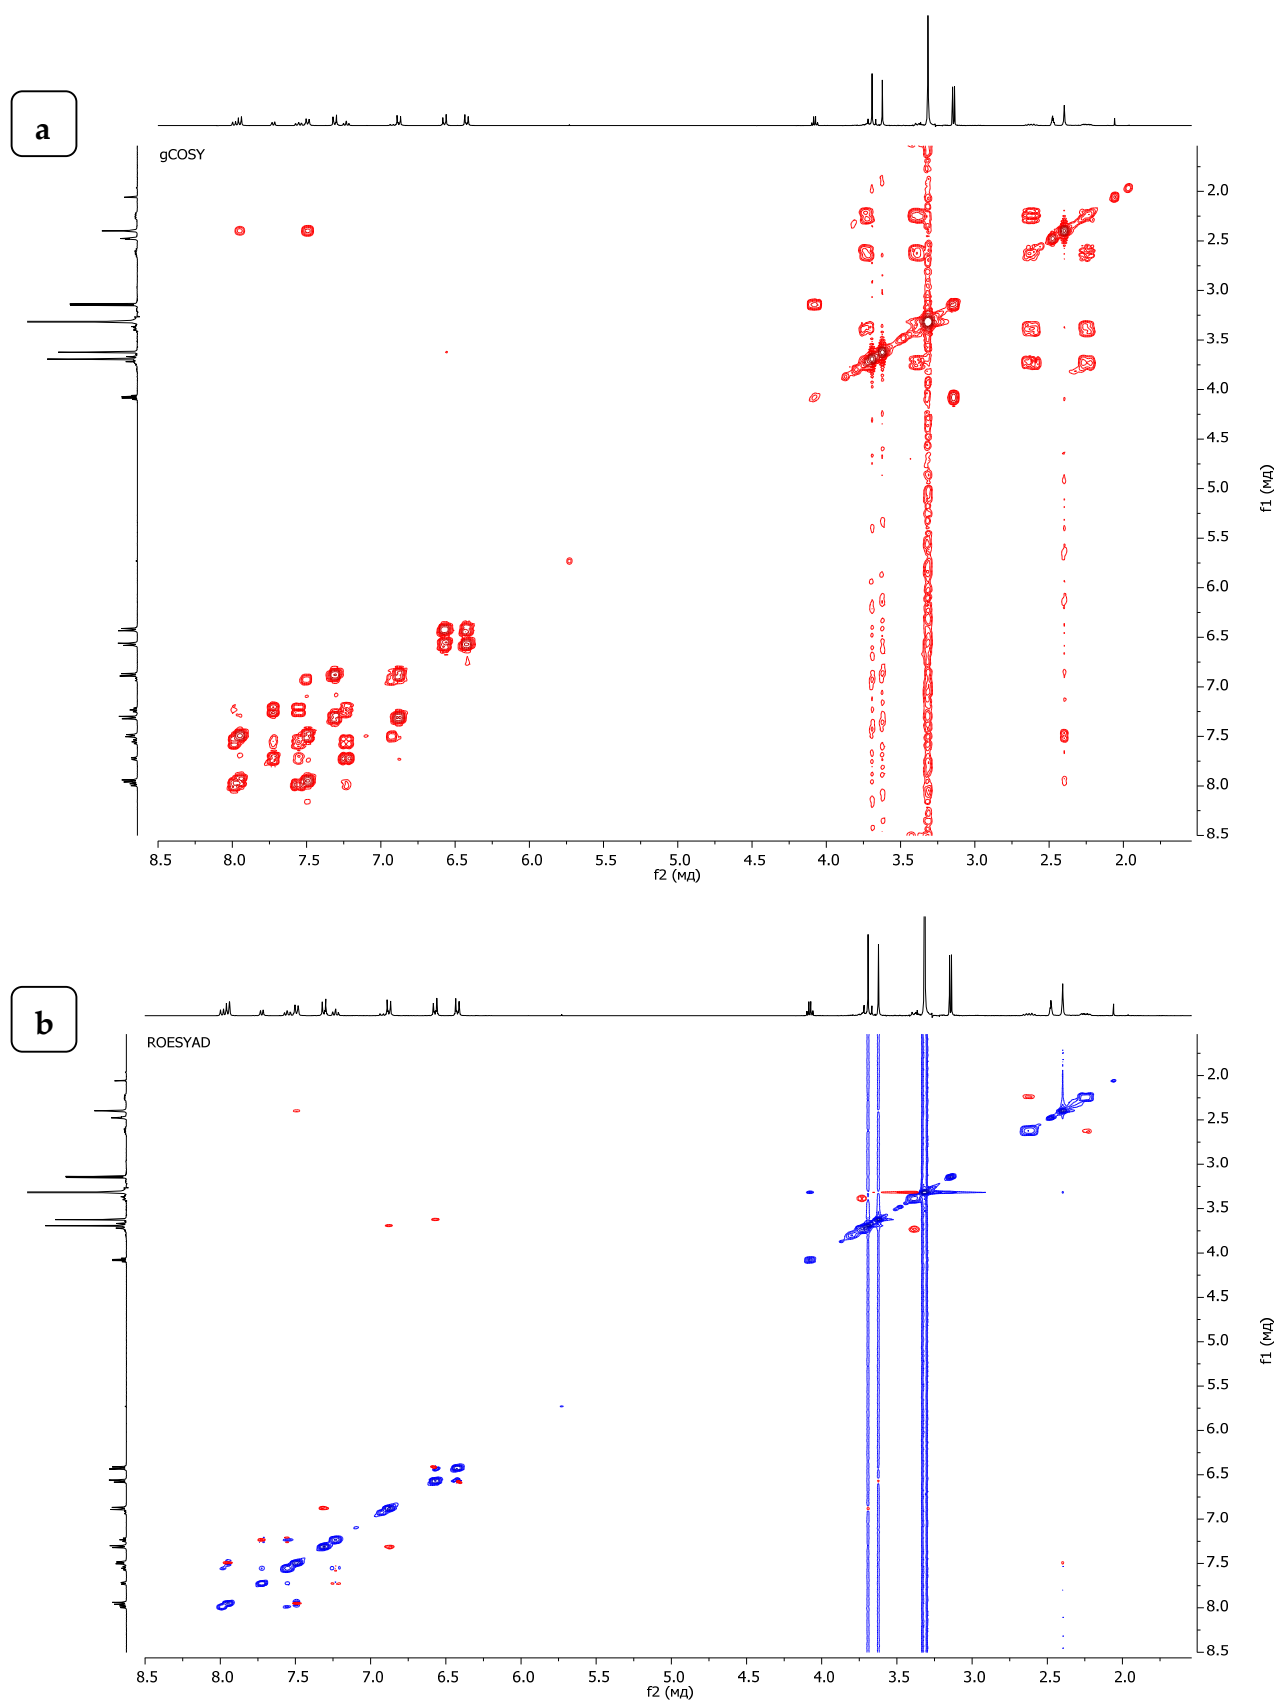

Figure S18: (a) gCOSY; (b)ROESYAD)

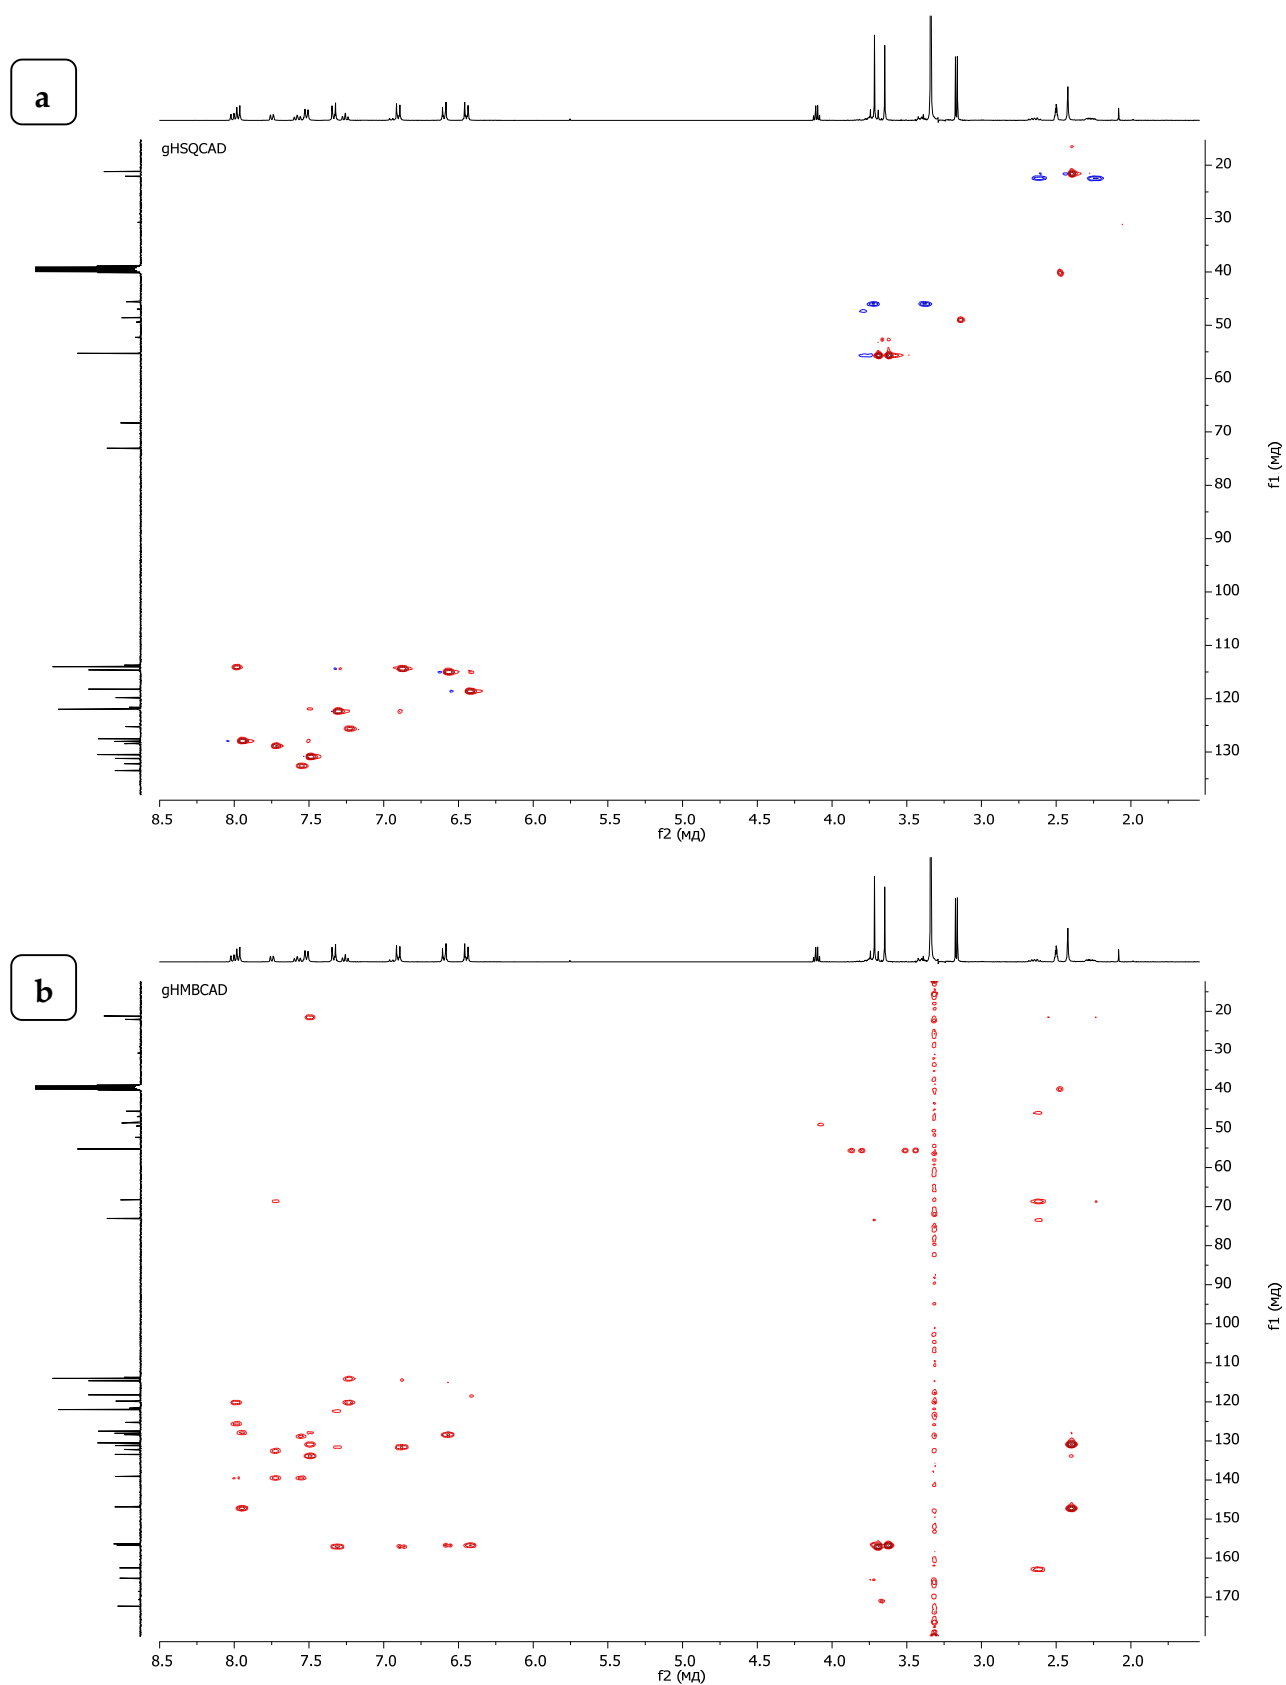

Figure S19: (a) gHSQCAD; (b)gHMBCAD

Spectrum from 052021.wiff (sample 34) - FVE 498 3, +TOF MS (100 - 3000) from 0.577 to 0.618 min

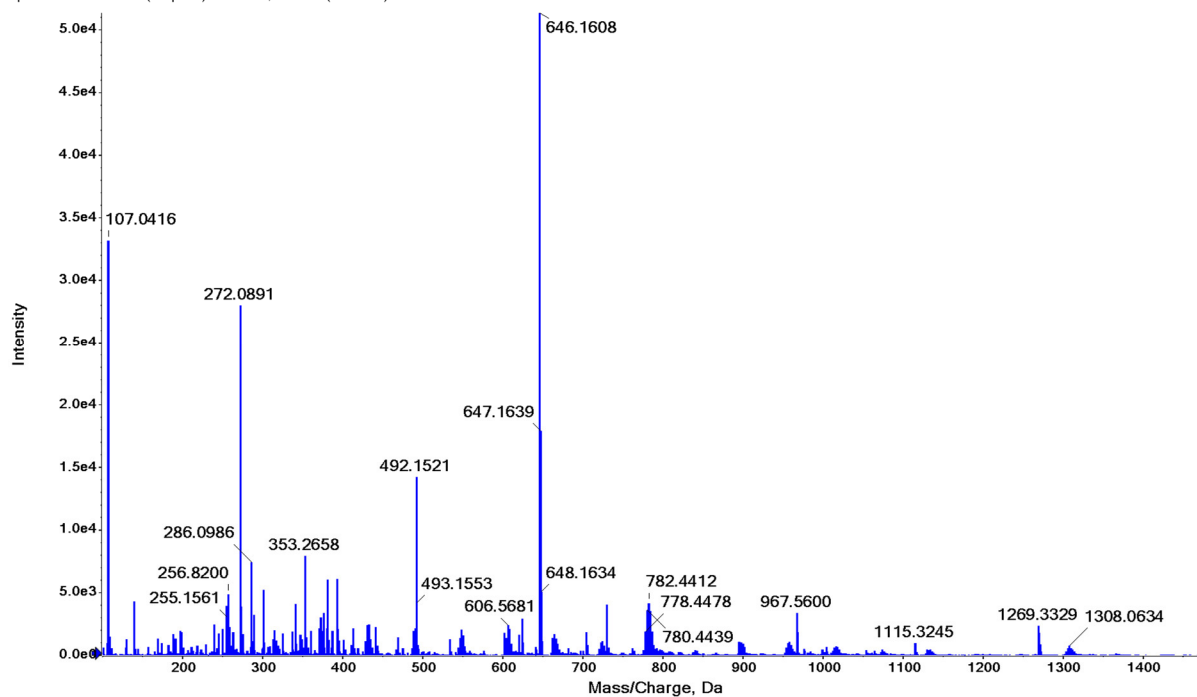

Spectrum from 052021.wiff (sample 34) - FVE 498 3, +TOF MS (100 - 3000) from 0.577 to 0.618 min

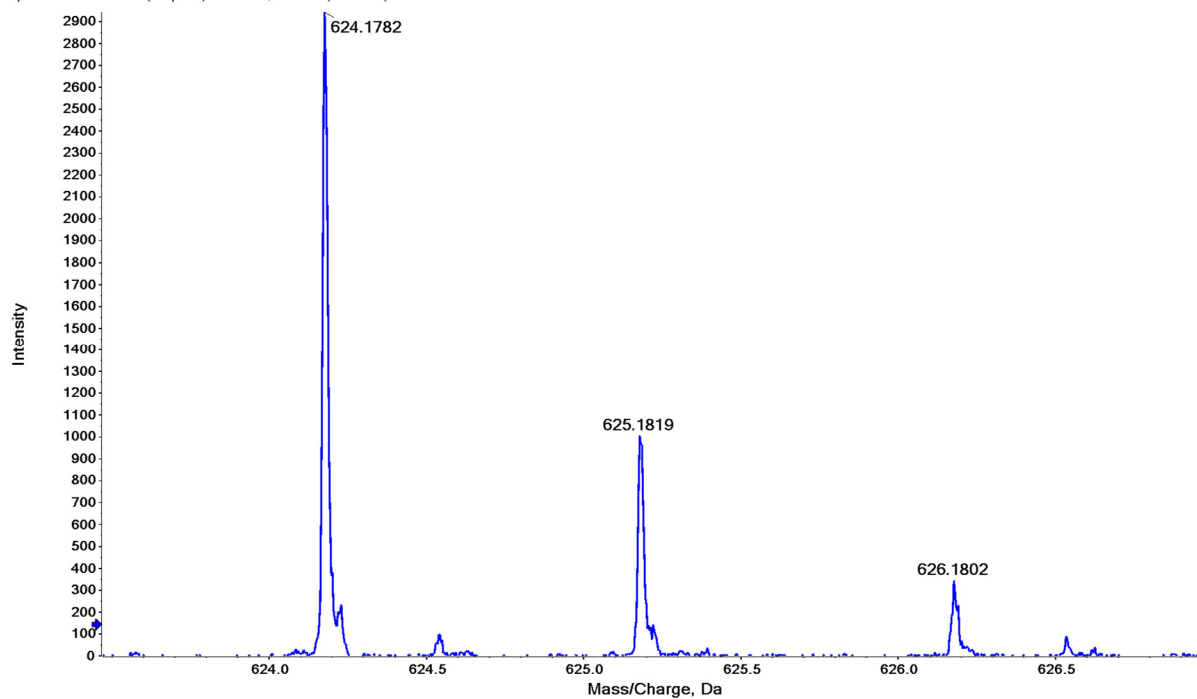

Figure S20

*N*,1-bis(4-methoxyphenyl)-2-oxopyrrolidine-3-carboxamide (7)

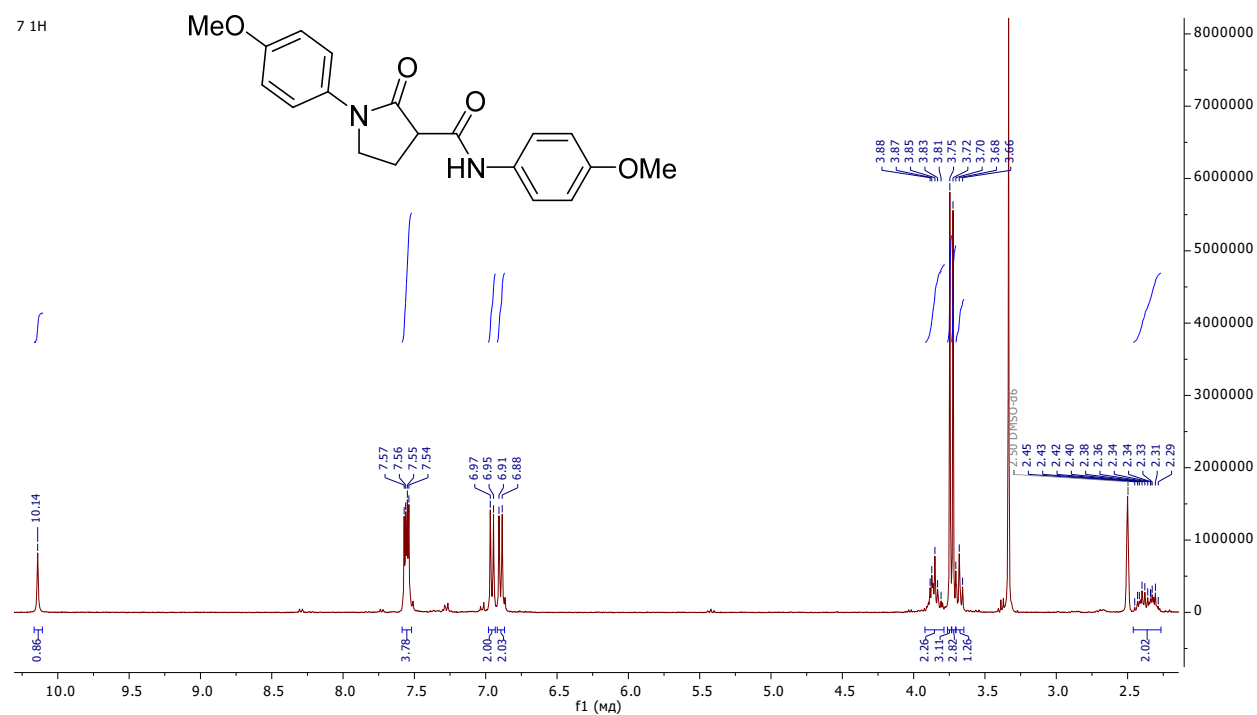

Spectrum from 052021.wiff (sample 35) - FVE 498 4, +TOF MS (100 - 3000) from 0.577 to 0.618 min

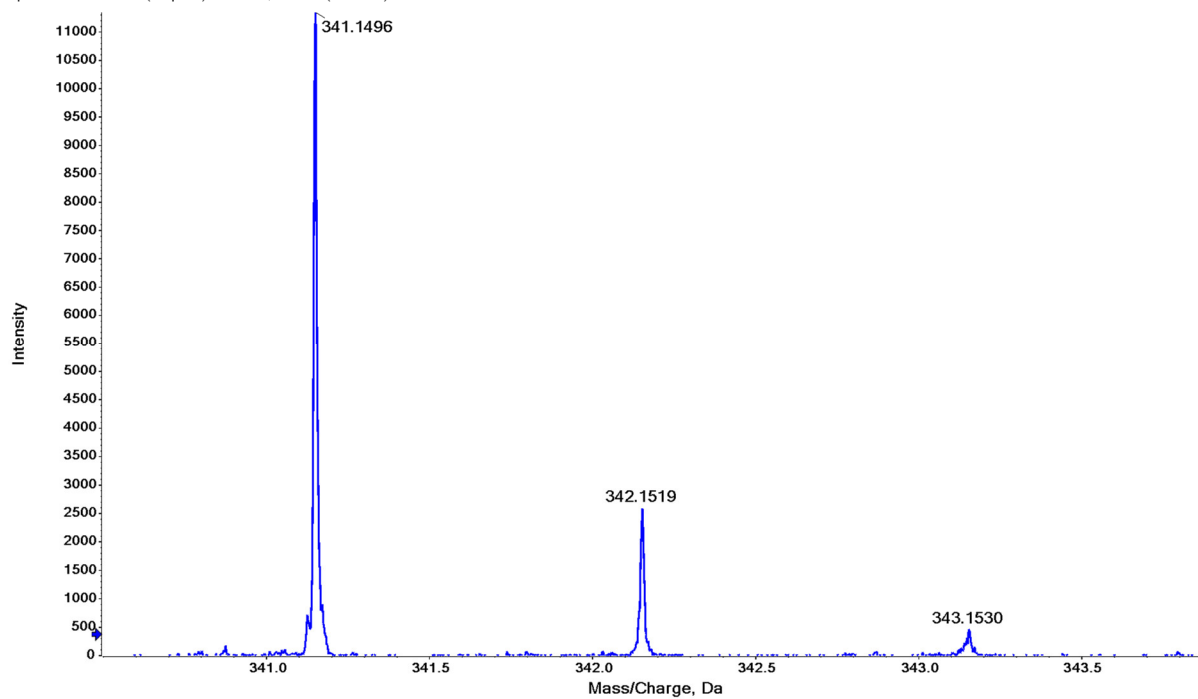

Figure S21

(3*S*,3'*S*)-1'-(4-methoxyphenyl)-1''-(*p*-tolyl)dispiro[indoline-3,2'-azetidine-3',3''-pyrrolidine]-2,2'',4'-trione (**5b**)

5b 1H

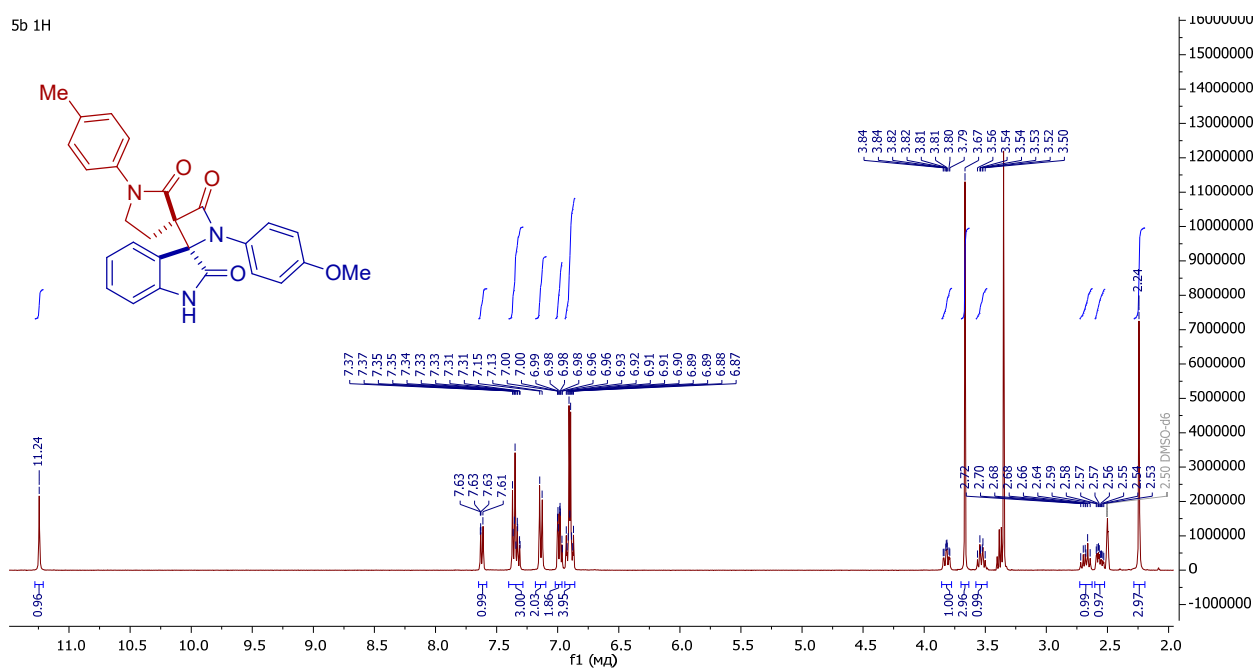

5b 13C

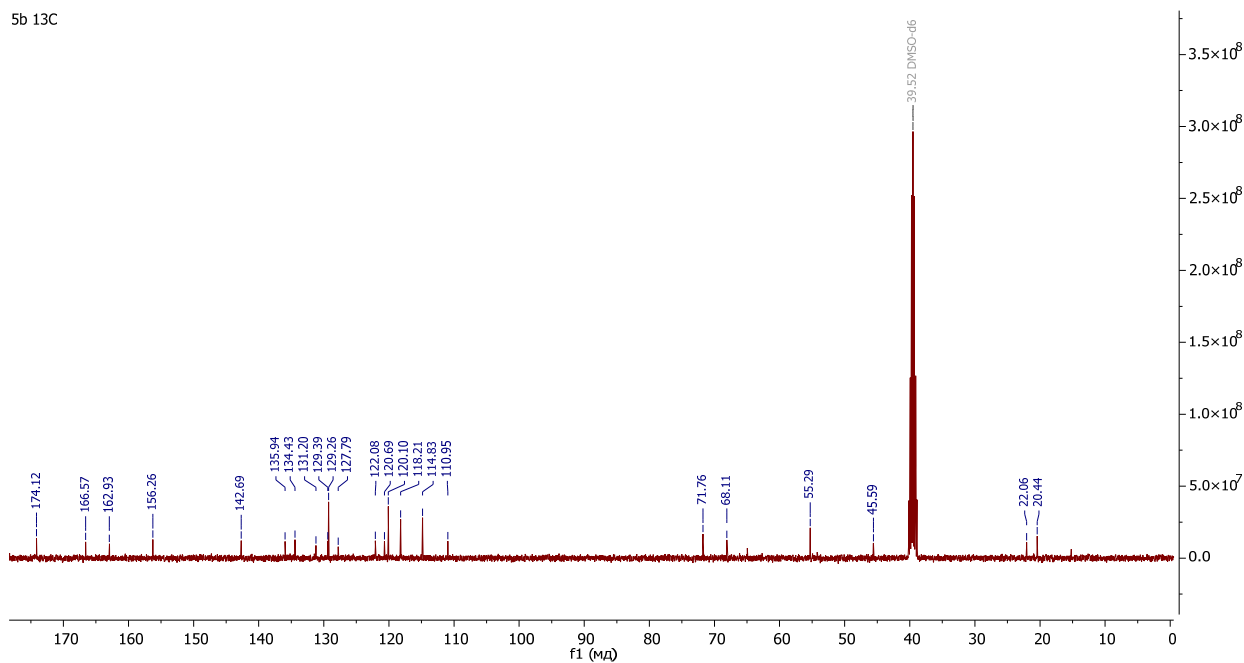

Figure S22

Spectrum from POS.wiff (sample 10) - FVE 548-5, +TOF MS (100 - 3000) from 0.790 to 0.832 min, subtracted by (Spectrum from POS.wiff (sample 10) - FVE 548-5, +TOF MS (100 - 3000) from 0.623 to 0.697 min)

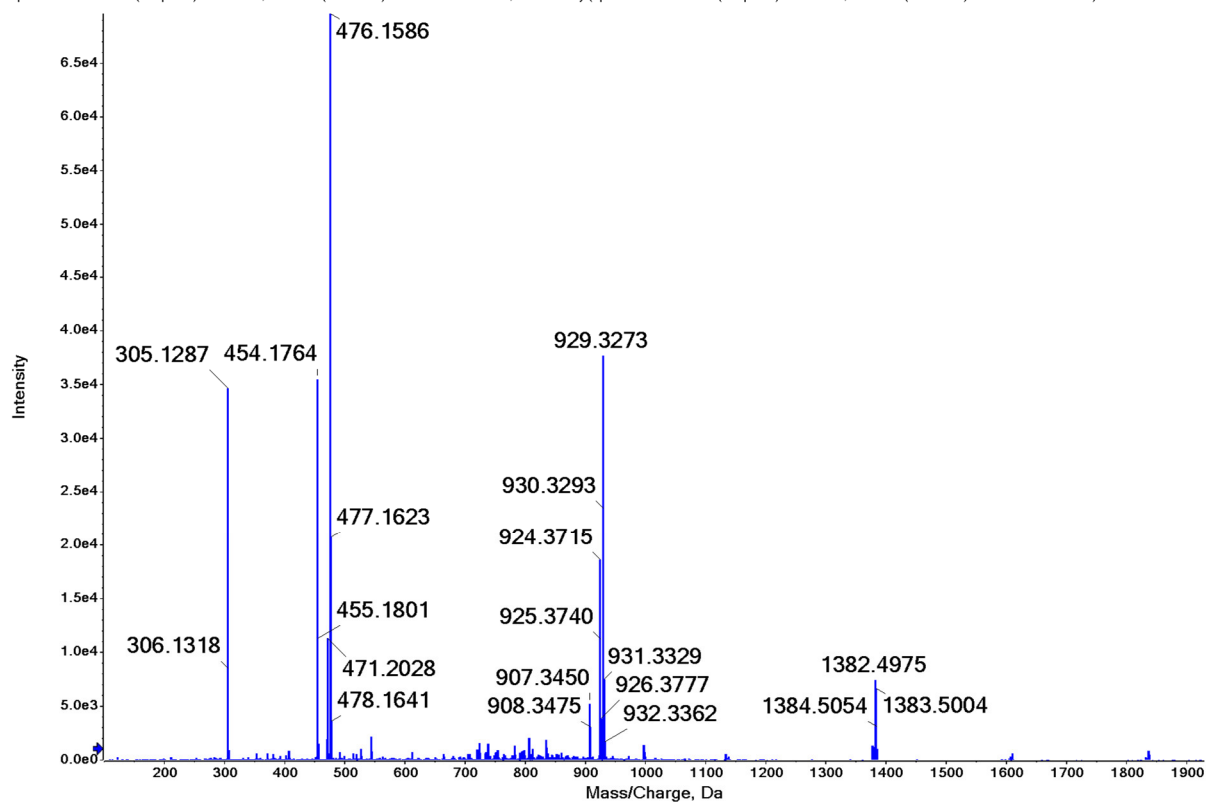

Spectrum from POS.wiff (sample 10) - FVE 548-5, +TOF MS (100 - 3000) from 0.790 to 0.832 min, subtracted by (Spectrum from POS.wiff (sample 10) - FVE 548-5, +TOF MS (100 - 3000) from 0.623 to 0.697 min)

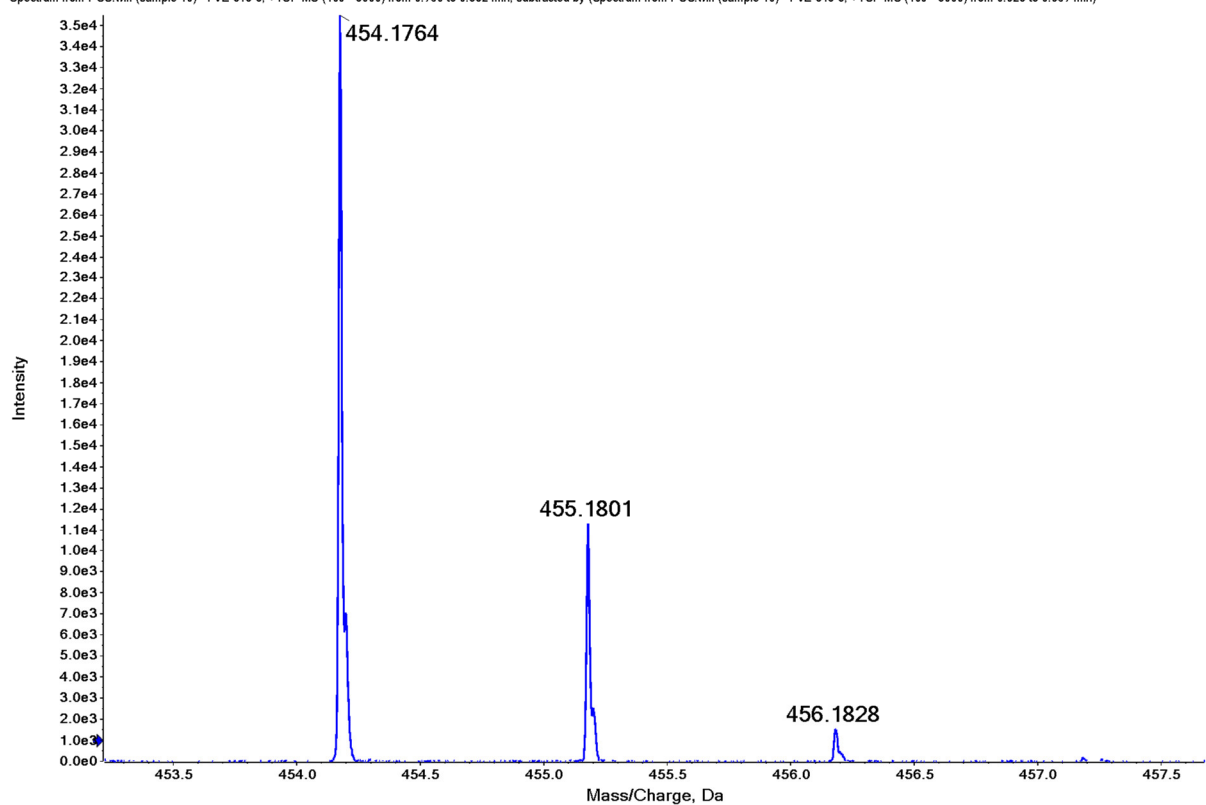

Figure S23



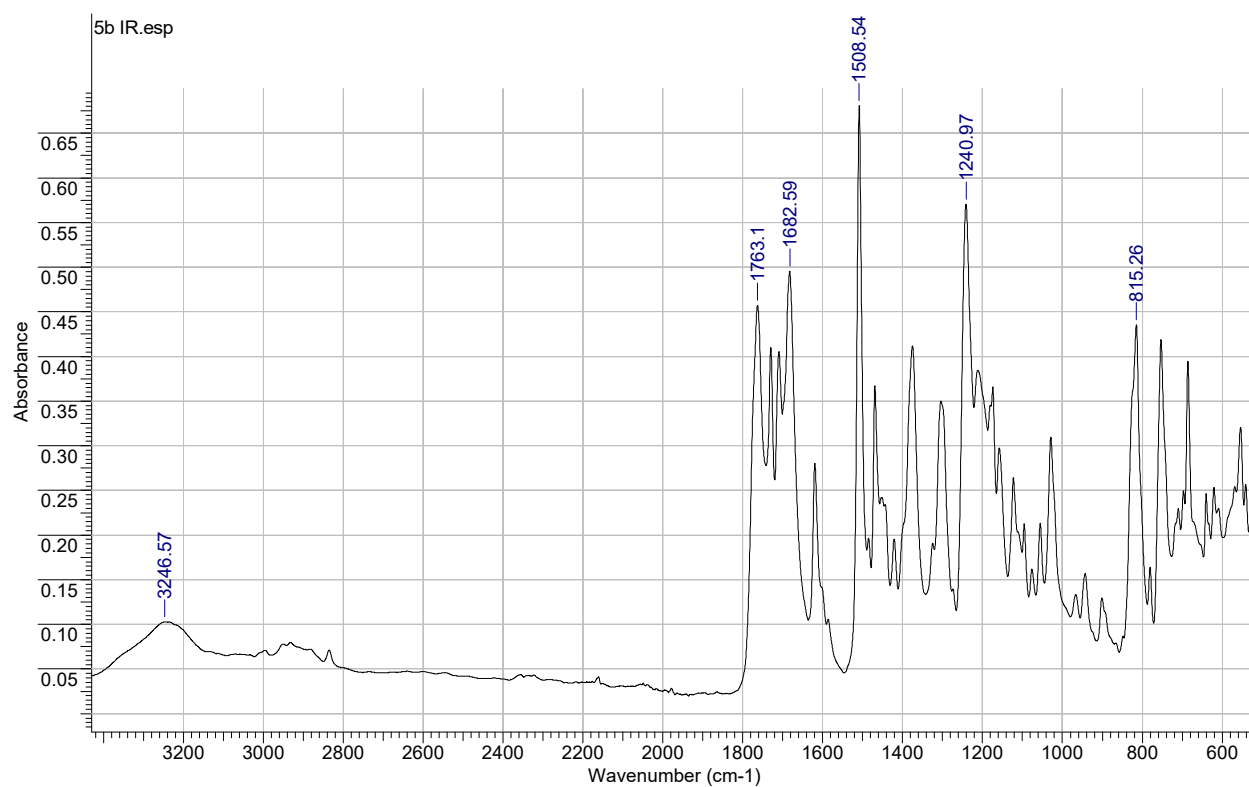

Figure S24

(3*S*,3'*S*)-1''-(4-chlorophenyl)-1'-(4-methoxyphenyl)dispiro[indoline-3,2'-azetidine-3',3''-pyrrolidine]-2,2'',4'-trione (**5c**)

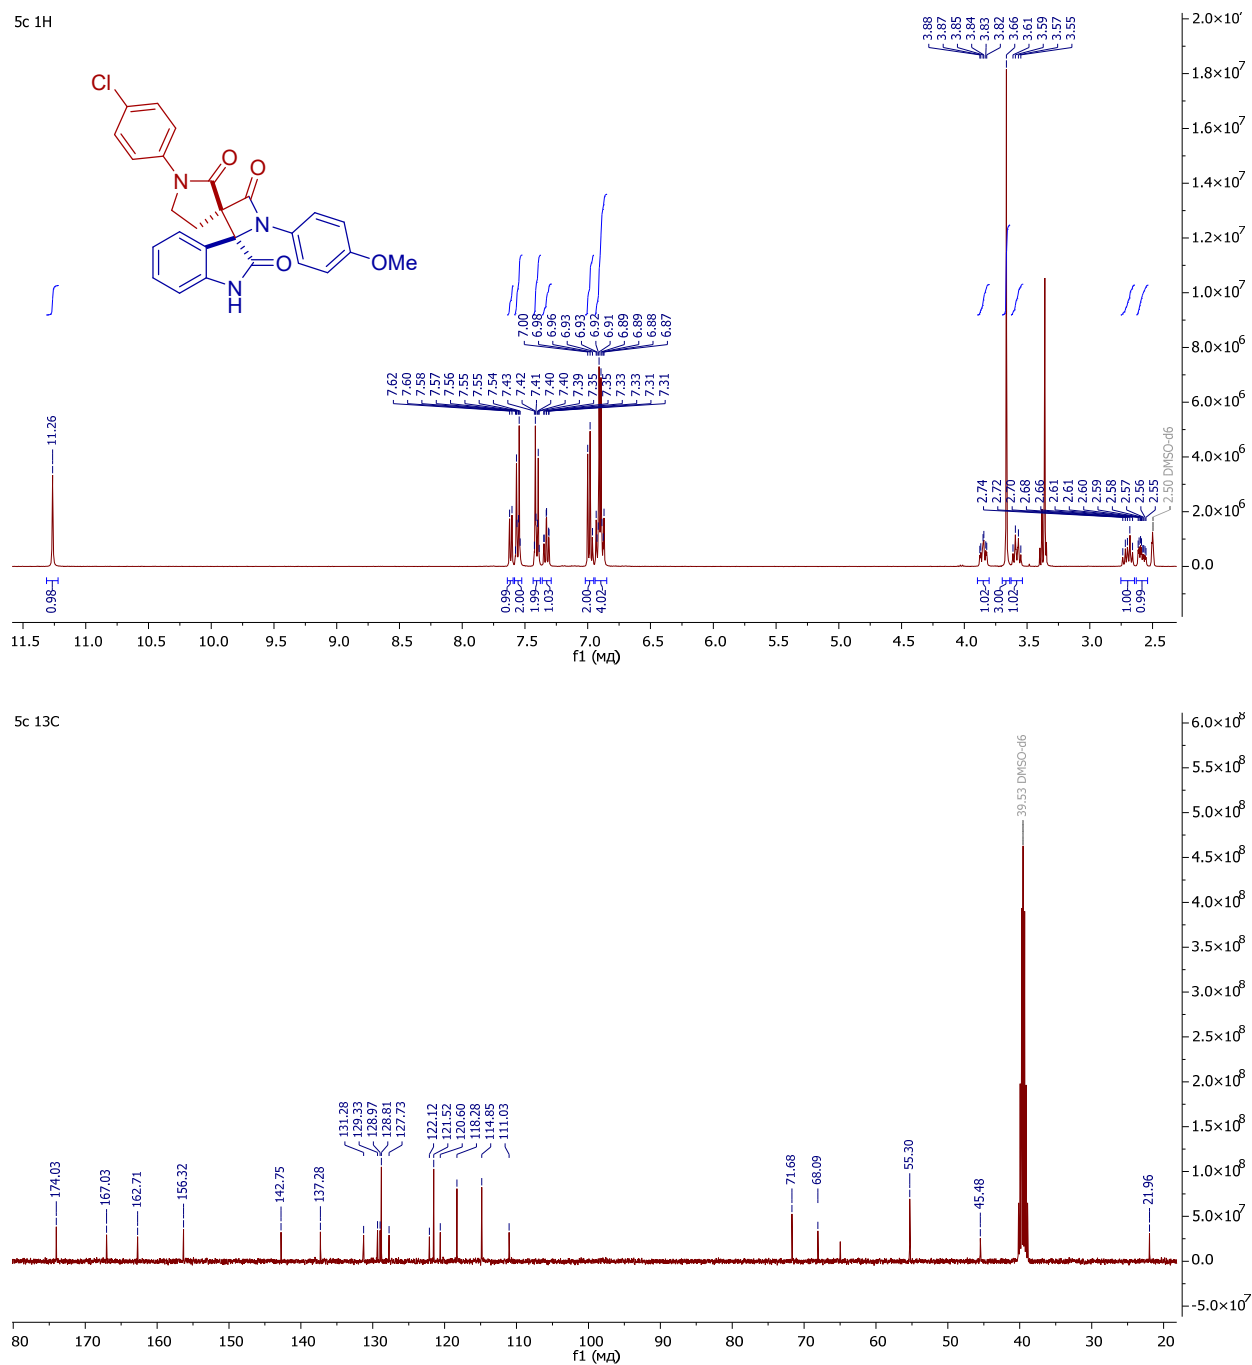

Figure S25

Spectrum from POS.wiff (sample 4) - FVE 542-5, +TOF MS (100 - 3000) from 0.790 to 0.832 min, subtracted by (Spectrum from POS.wiff (sample 4) - FVE 542-5, +TOF MS (100 - 3000) from 0.623 to 0.697 min)

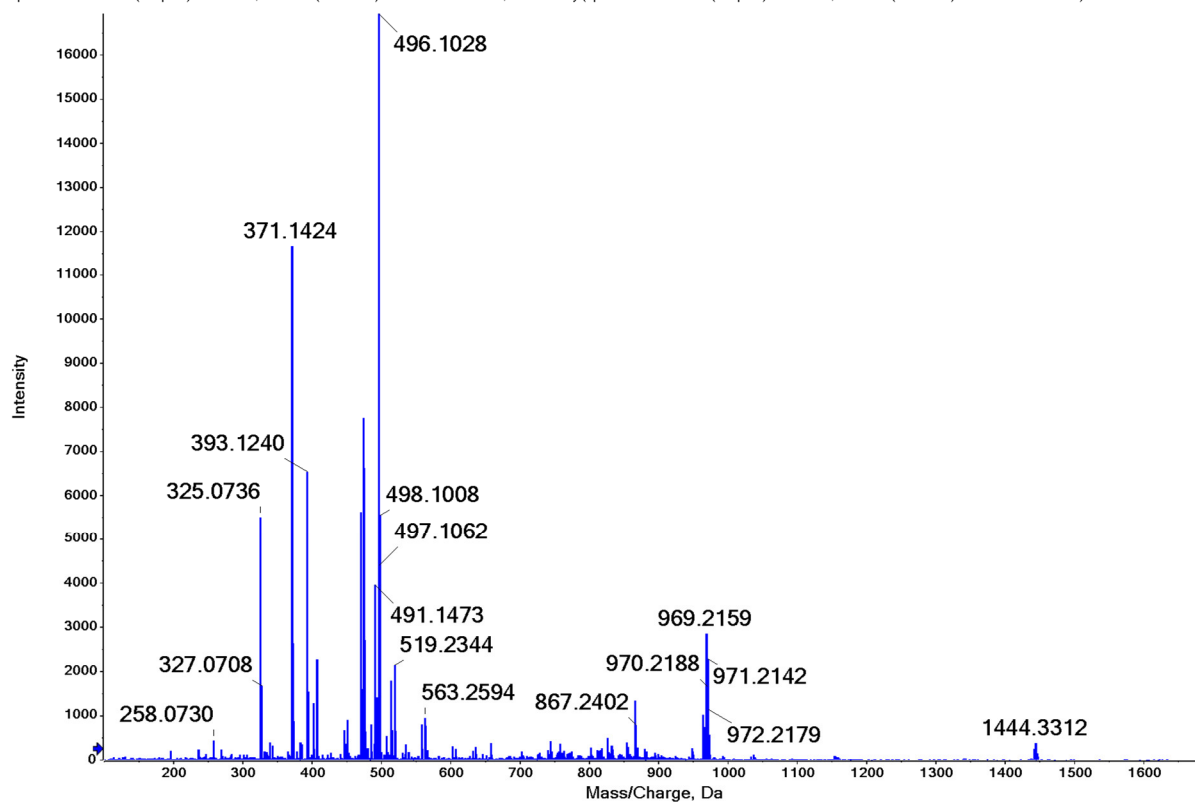

Spectrum from POS.wiff (sample 4) - FVE 542-5, +TOF MS (100 - 3000) from 0.790 to 0.832 min, subtracted by (Spectrum from POS.wiff (sample 4) - FVE 542-5, +TOF MS (100 - 3000) from 0.623 to 0.697 min)

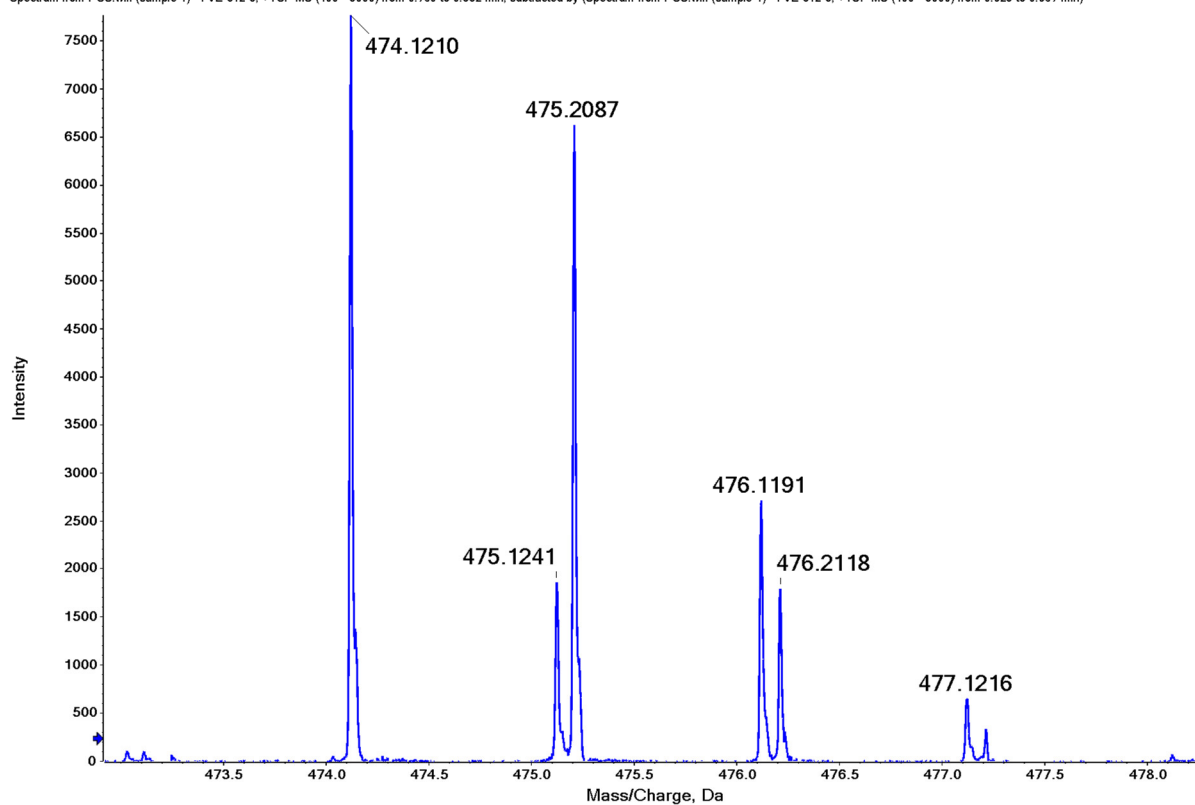

Figure S26

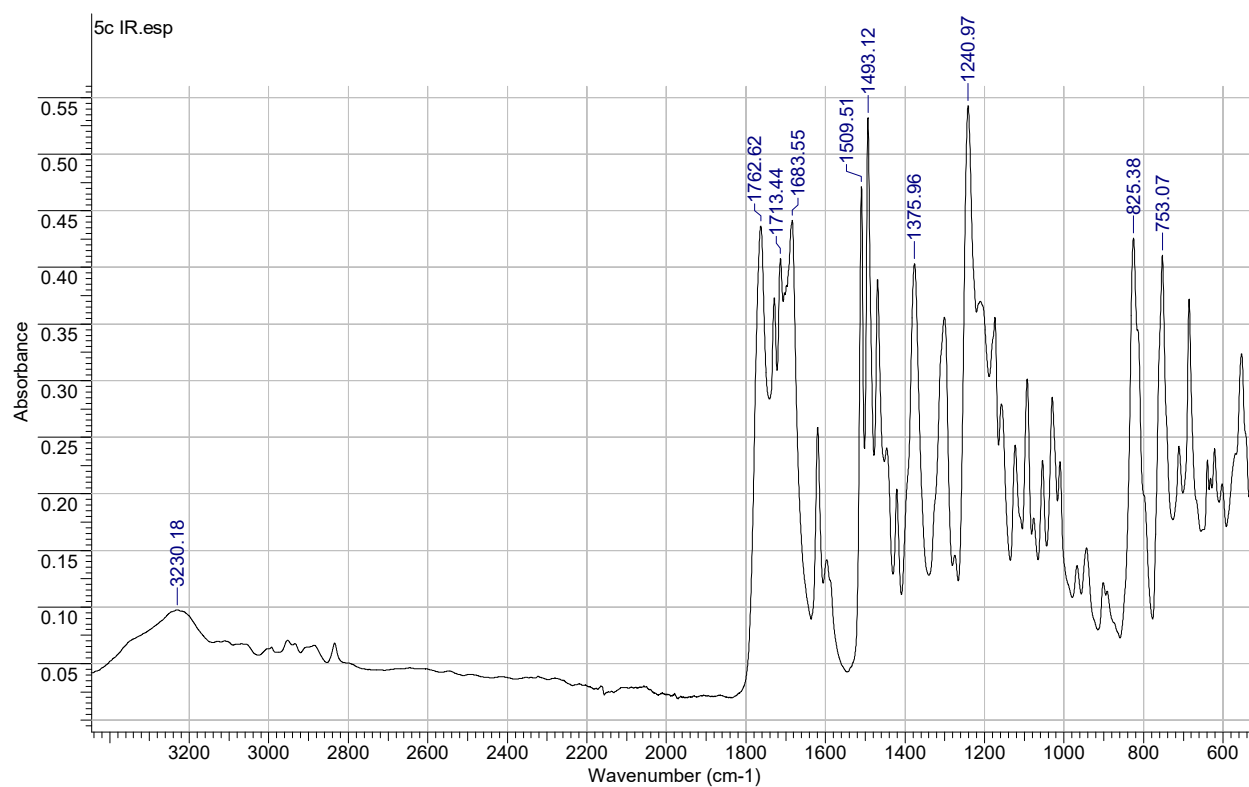

Figure S27

(3*S*,3'*S*)-1',1''-di-*m*-tolylspiro[indoline-3,2'-azetidine-3',3''-pyrrolidine]-2,2'',4'-trione (**5d**)

5d <sup>1</sup>H

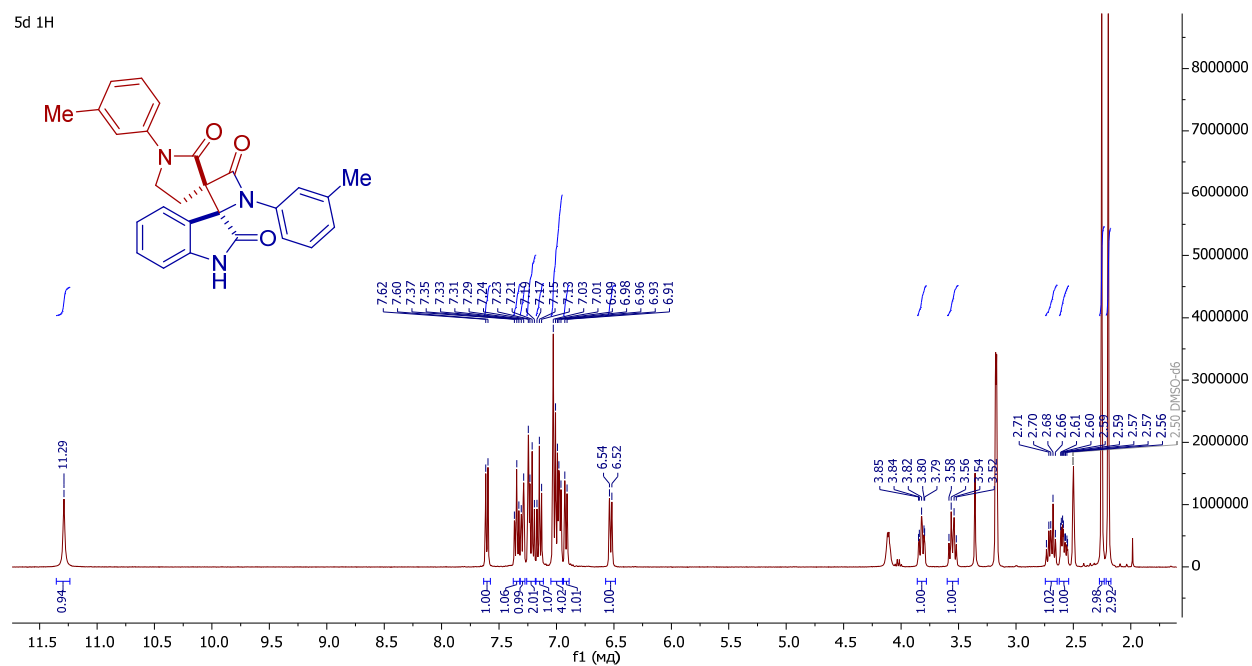

5d <sup>13</sup>C

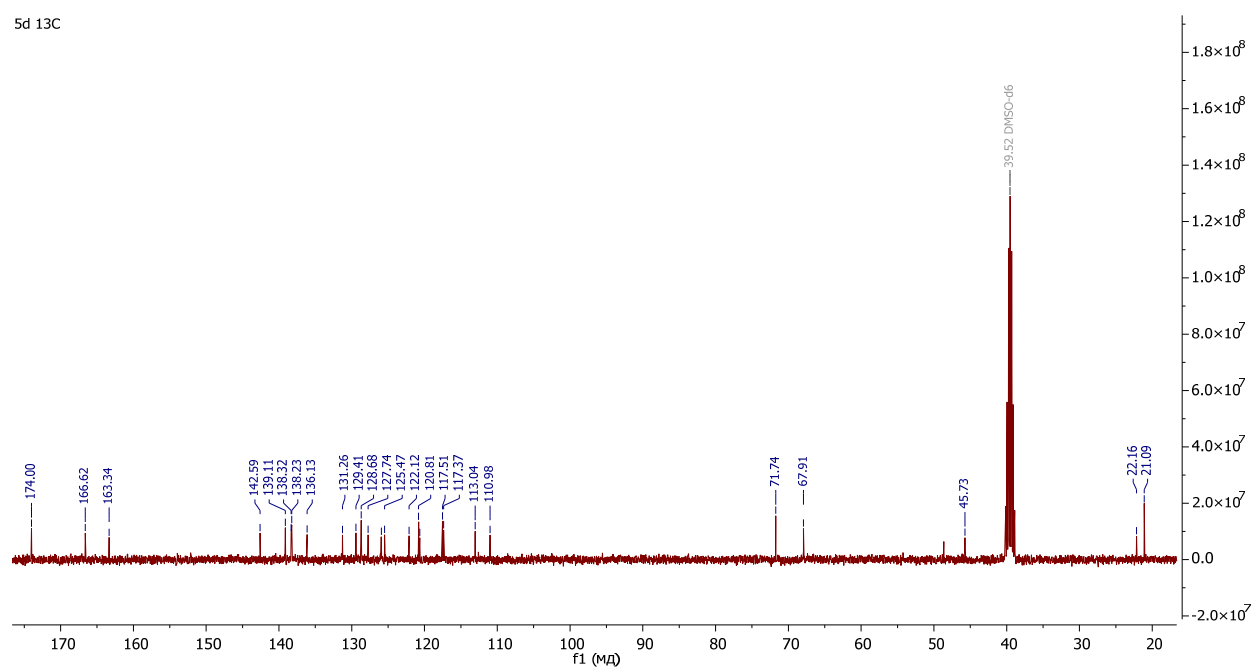

Figure S28

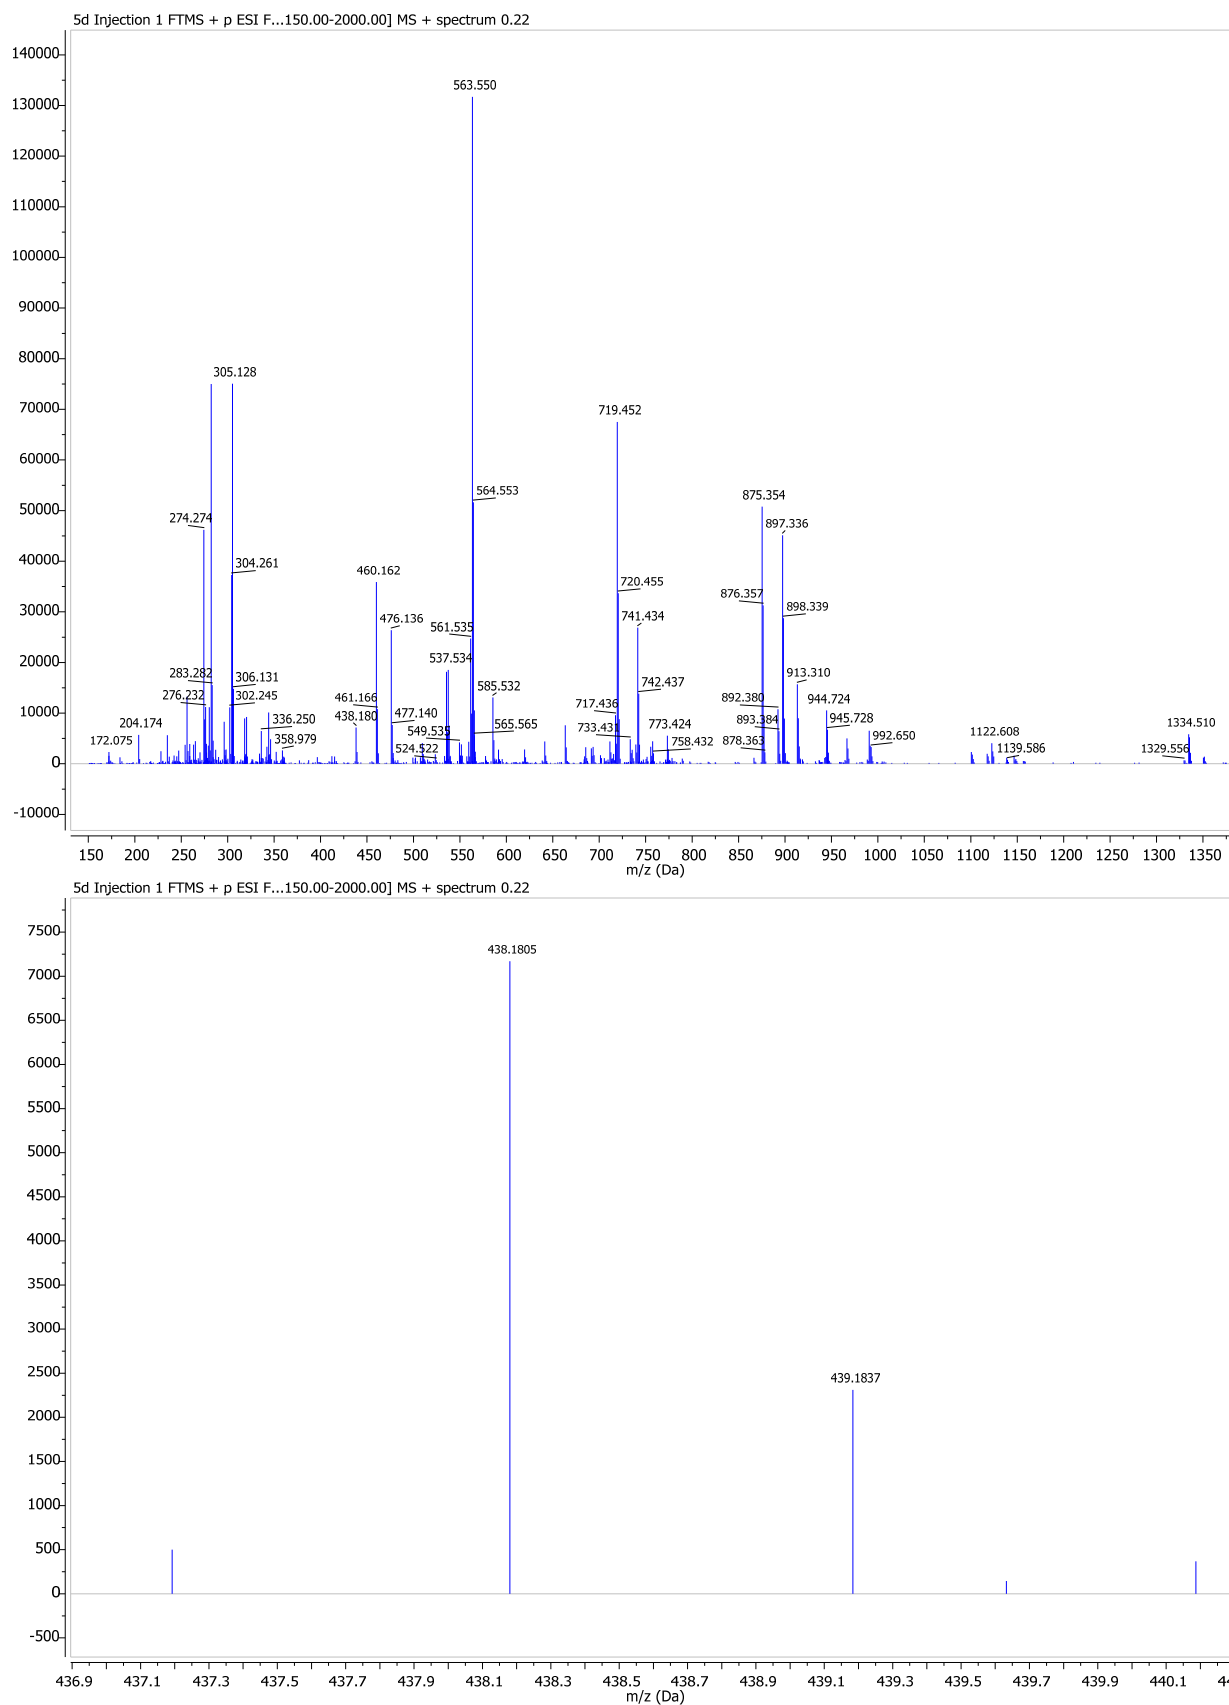

Figure S29

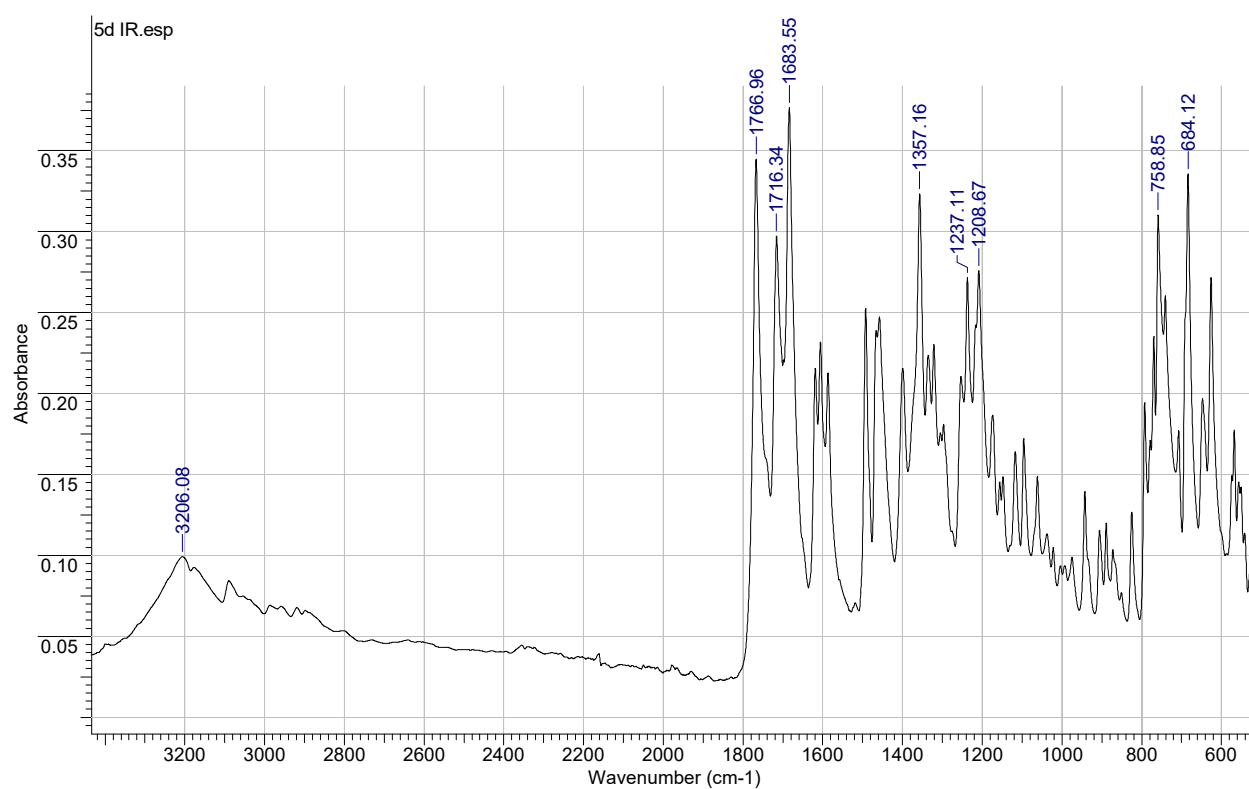

Figure S30

(3*S*,3'*S*)-1''-(4-chlorophenyl)-1'-(*m*-tolyl)dispiro[indoline-3,2'-azetidine-3',3''-pyrrolidine]-2,2'',4'-trione (**5e**)

5e 1H

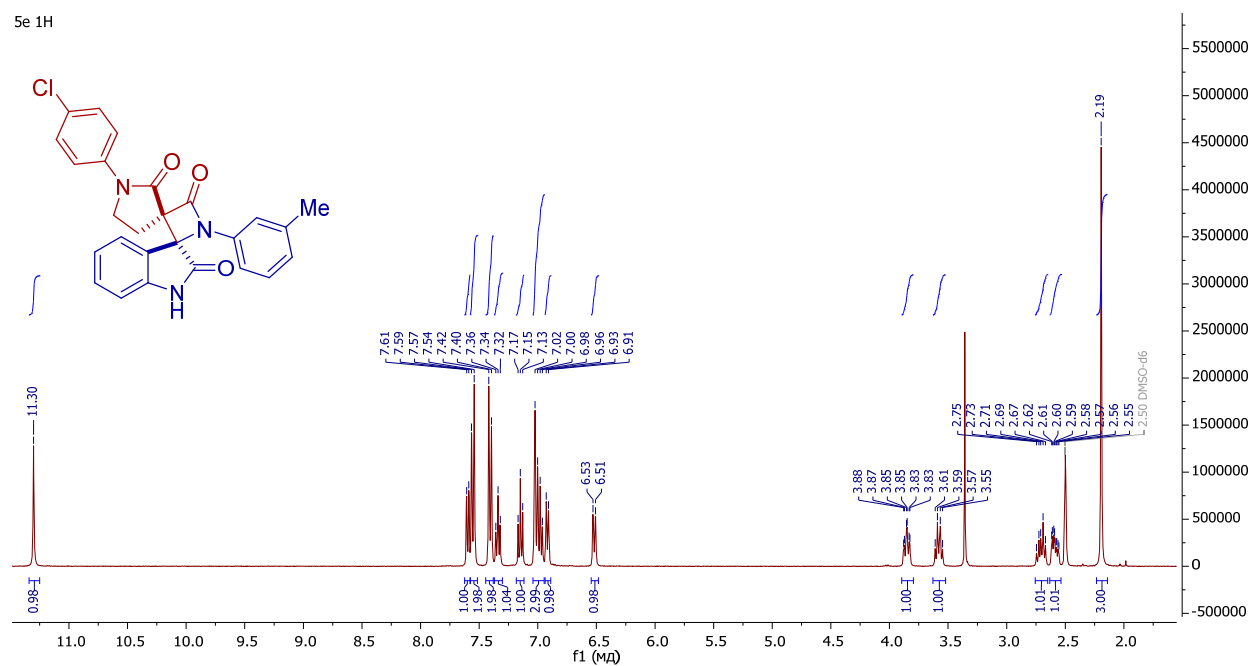

FVE-553Re-5.2.1.1r

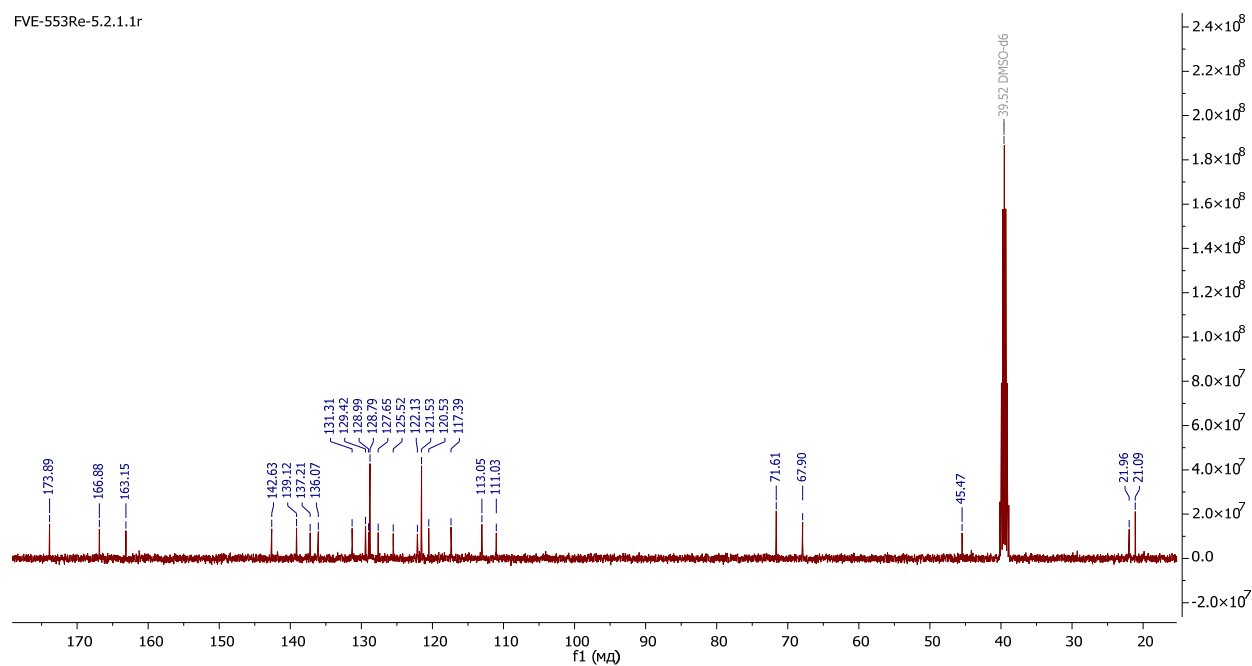

Figure S31



Spectrum from 010122\_POS.wiff (sample 153) - FVE 553Re5, +TOF MS (100 - 3000) from 0.776 to 0.... from 010122\_POS.wiff (sample 153) - FVE 553Re5, +TOF MS (100 - 3000) from 0.535 to 0.628 min)

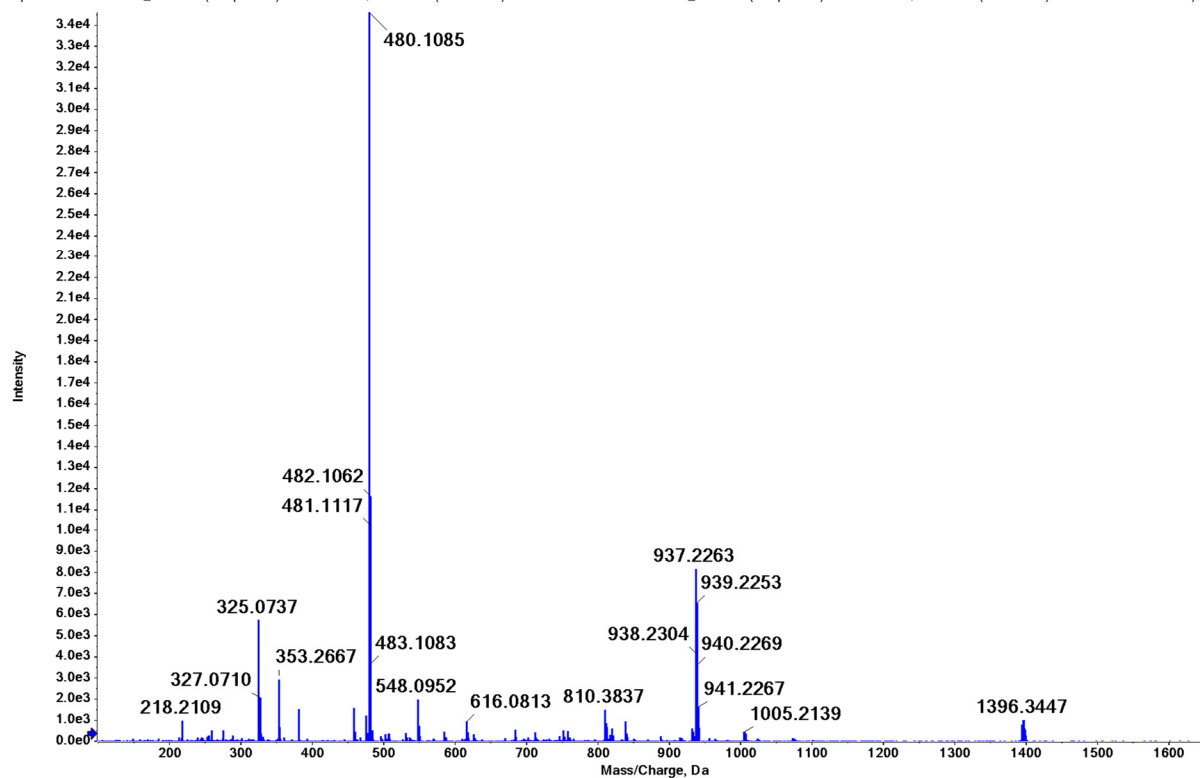

Spectrum from 010122\_POS.wiff (sample 153) - FVE 553Re5, +TOF MS (100 - 3000) from 0.776 to 0.... from 010122\_POS.wiff (sample 153) - FVE 553Re5, +TOF MS (100 - 3000) from 0.535 to 0.628 min)

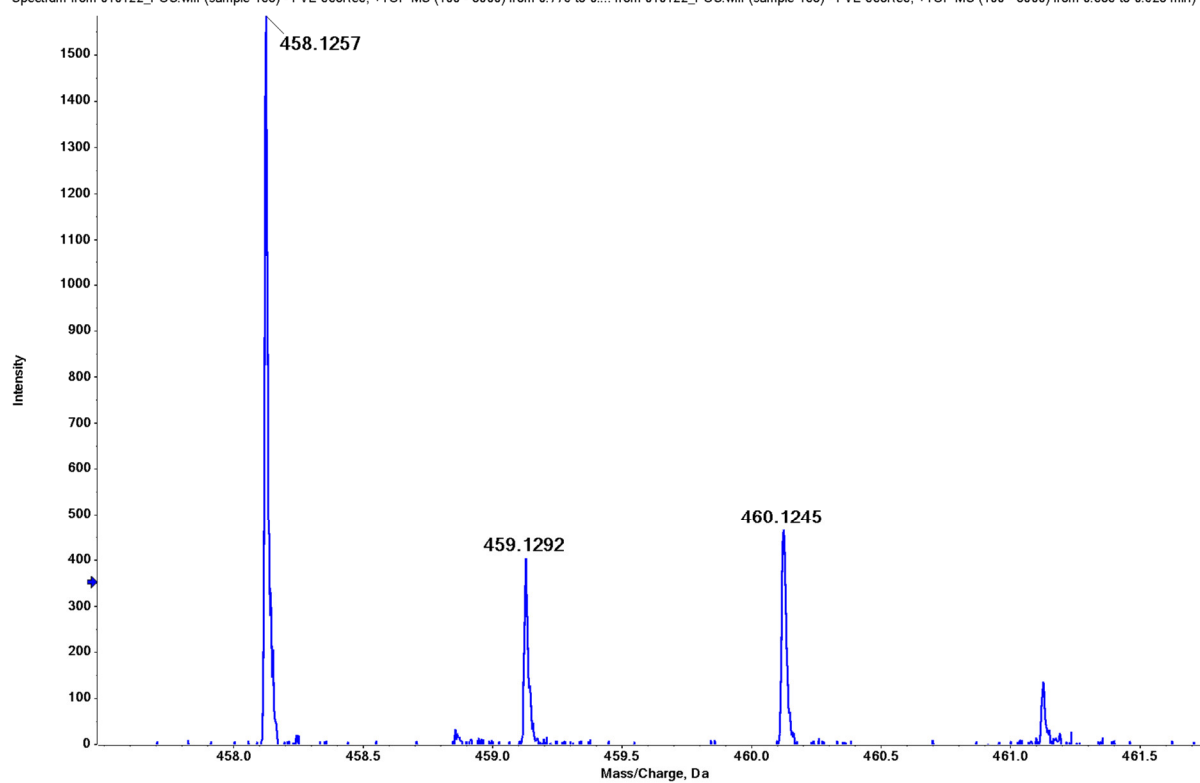

Figure S32

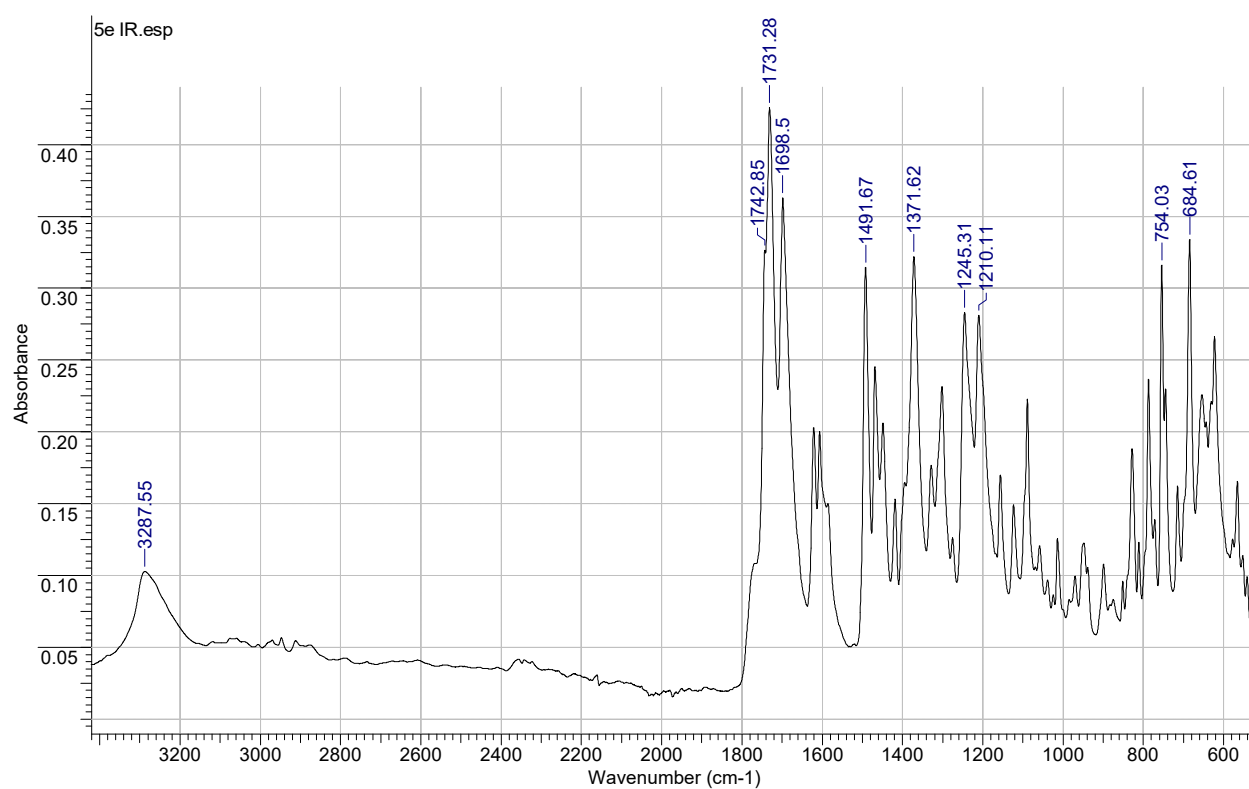

Figure S33

(3*S*,3'*S*)-1''-(3-chloro-4-fluorophenyl)-1'-(*m*-tolyl)dispiro[indoline-3,2'-azetidine-3',3''-pyrrolidine]-2,2'',4'-trione (**5f**)

5f <sup>1</sup>H

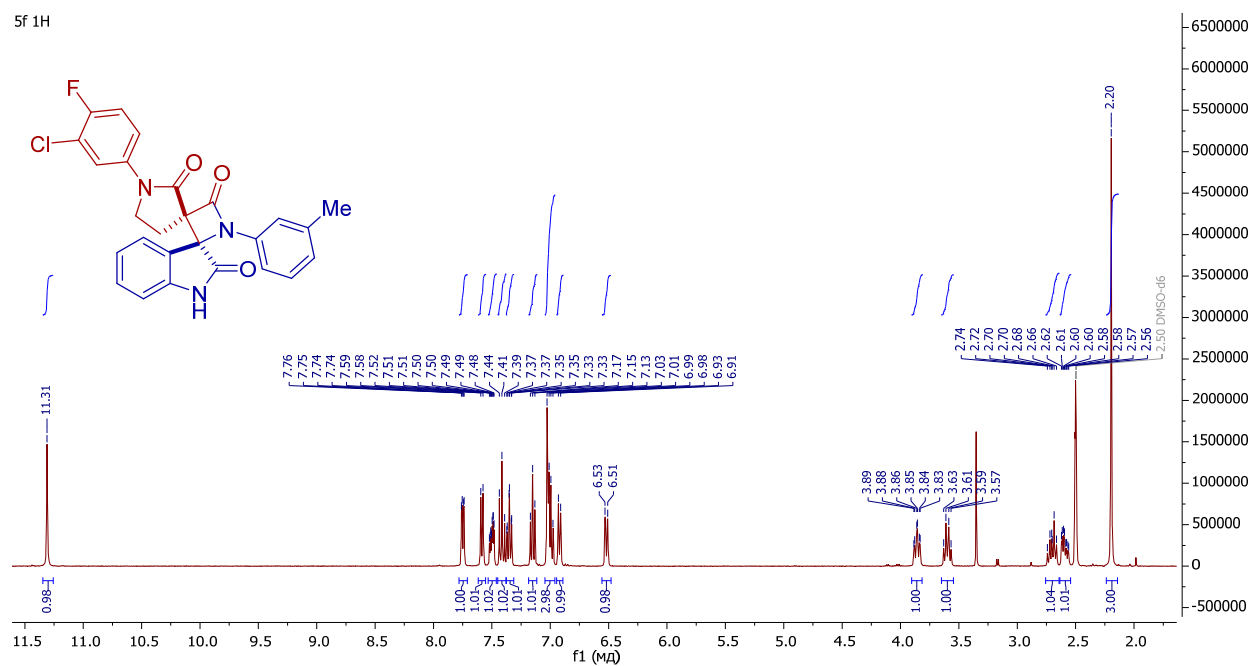

5f <sup>13</sup>C

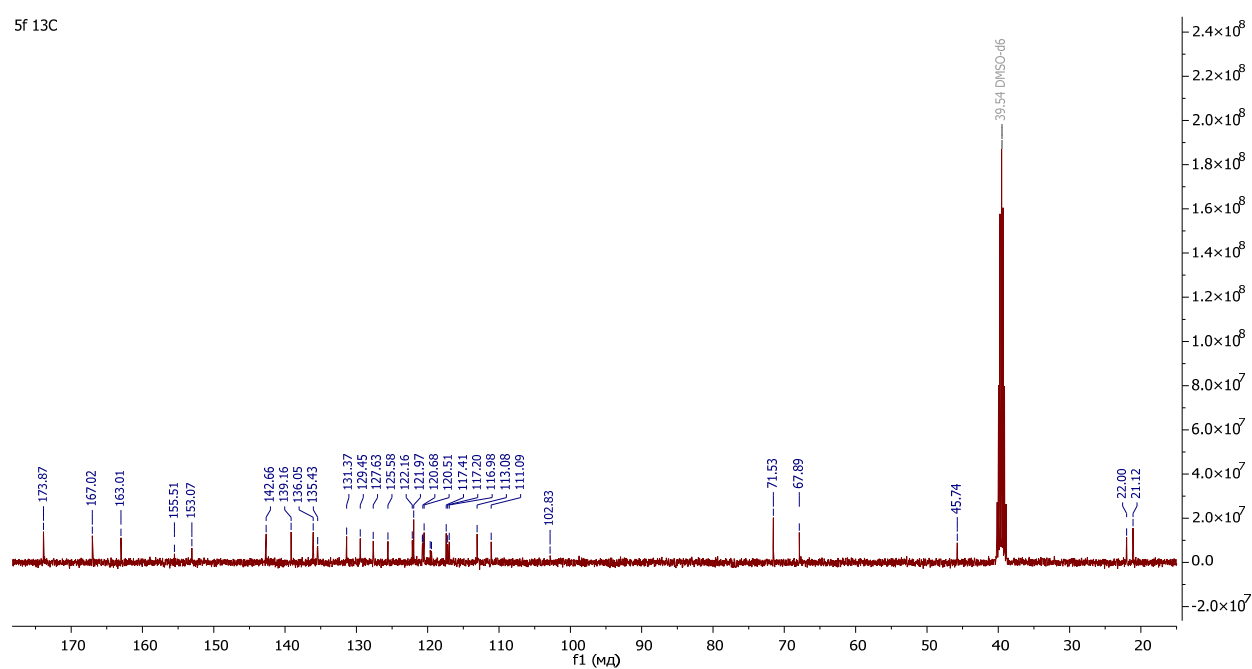

Figure S34

Spectrum from POS.wiff (sample 58) - FVE 567 5, +TOF MS (100 - 3000) from 0.795 to 0.879 min, subtr...d by (Spectrum from POS.wiff (sample 58) - FVE 567 5, +TOF MS (100 - 3000) from 0.484 to 0.600 min)

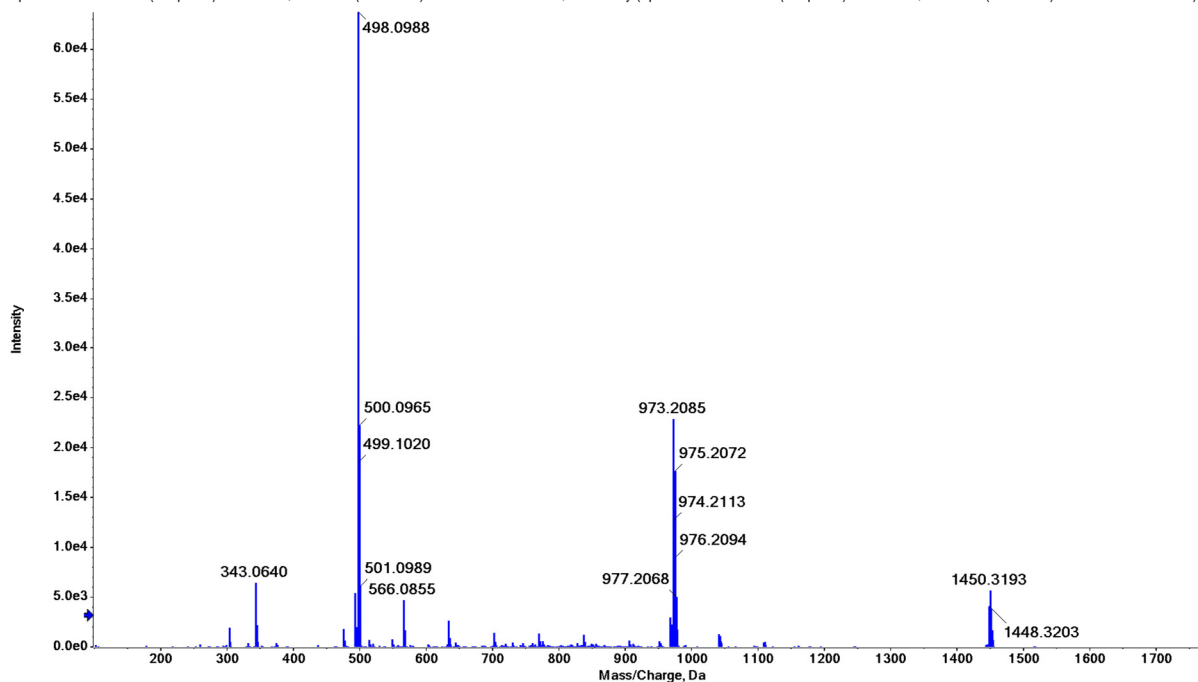

Spectrum from POS.wiff (sample 58) - FVE 567 5, +TOF MS (100 - 3000) from 0.795 to 0.879 min, subtr...d by (Spectrum from POS.wiff (sample 58) - FVE 567 5, +TOF MS (100 - 3000) from 0.484 to 0.600 min)

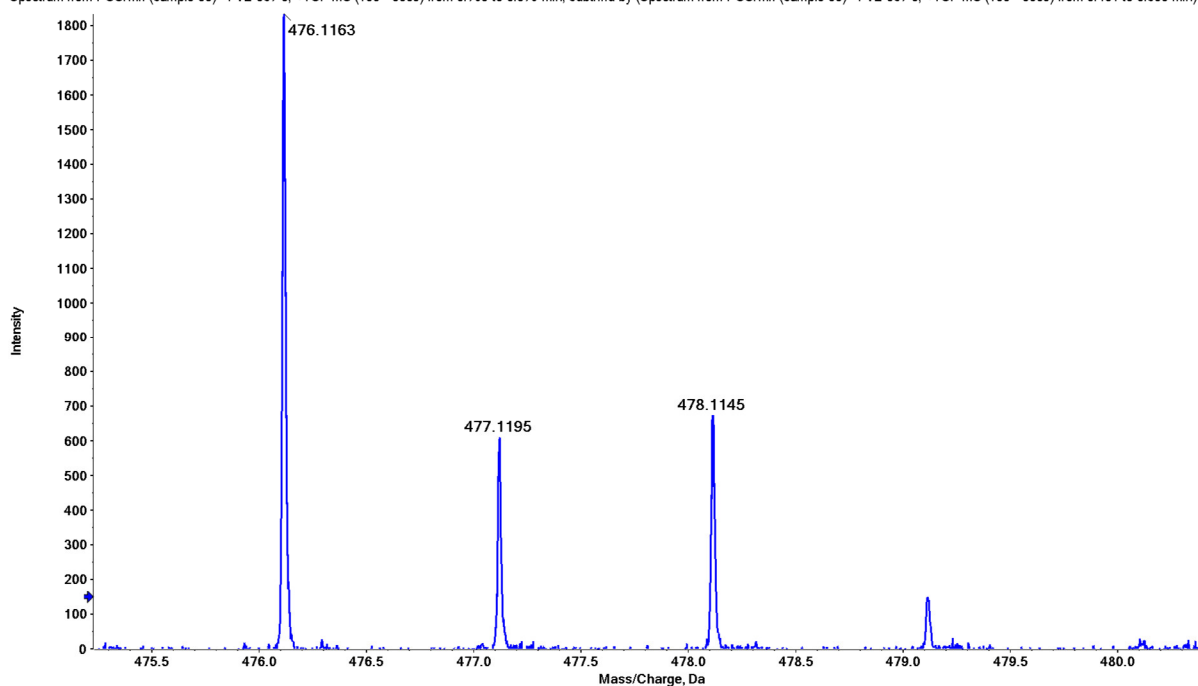

Figure S35

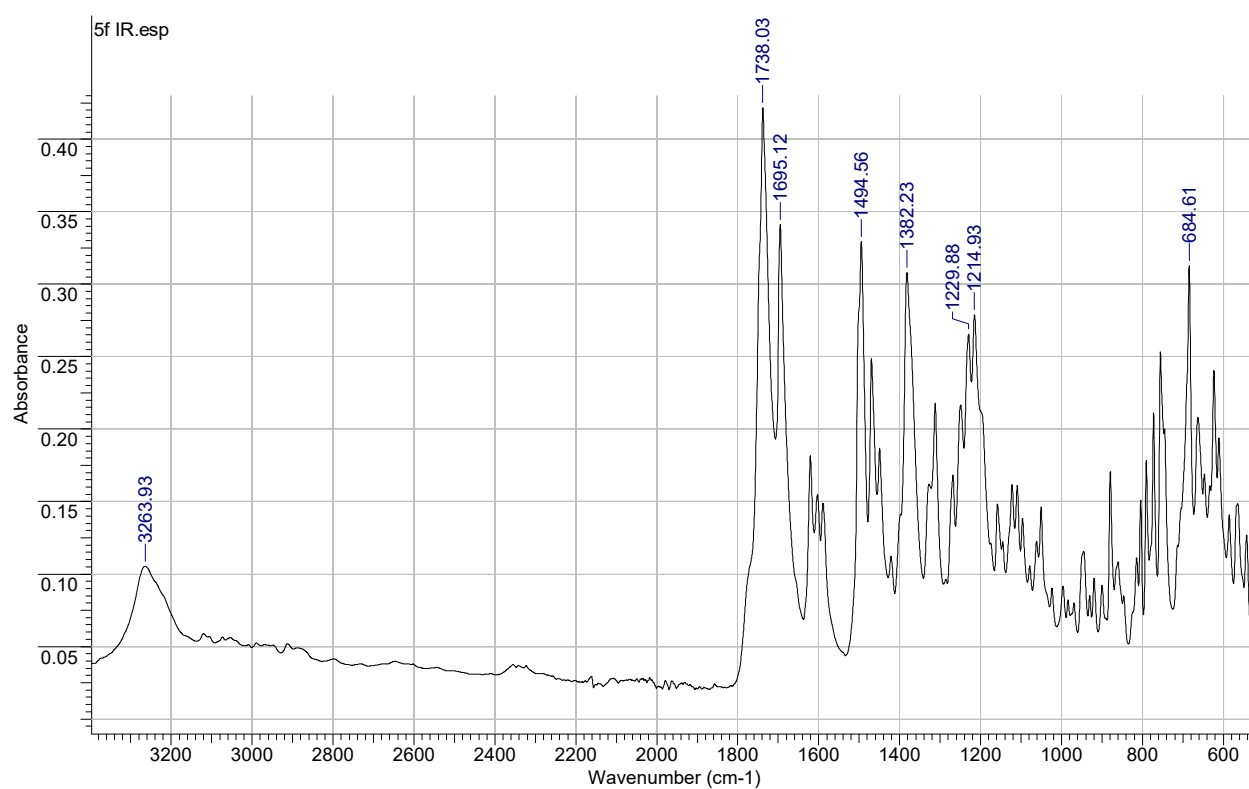

Figure S36

## X-Ray

### 5a (CCDC-2171648)

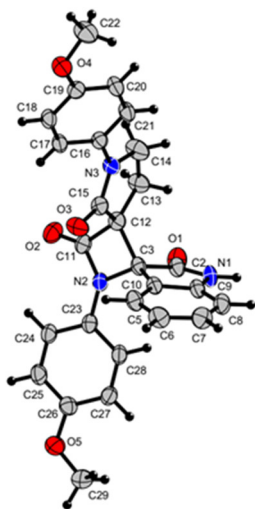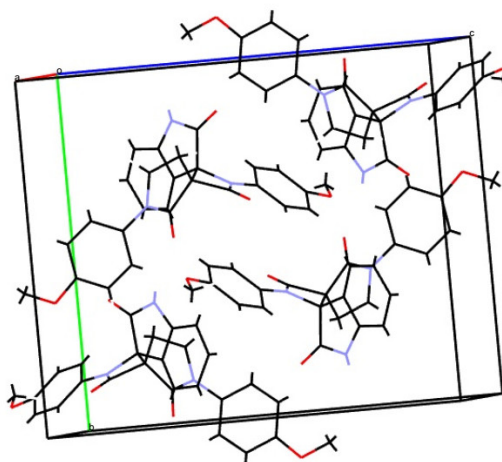

### 6 (CCDC-2172682)

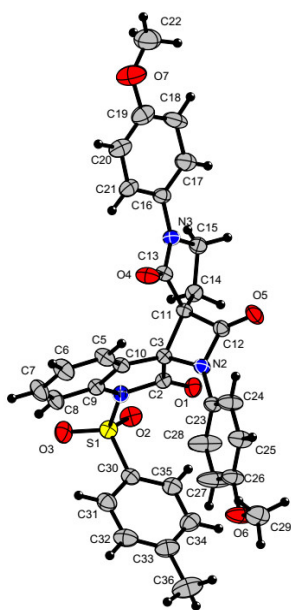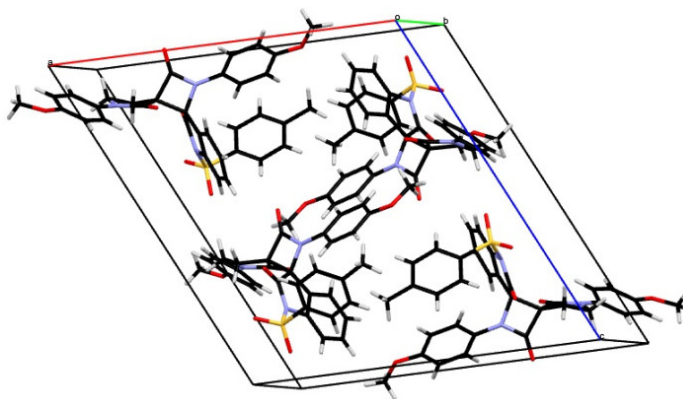

Figure S37

**Table S1.** Crystal data and structure refinement for compound **5a**.

|                                   |                                                               |                  |
|-----------------------------------|---------------------------------------------------------------|------------------|
| Identification code               | fve 4985                                                      |                  |
| Empirical formula                 | C <sub>27</sub> H <sub>23</sub> N <sub>3</sub> O <sub>5</sub> |                  |
| Formula weight                    | 469.48                                                        |                  |
| Temperature                       | 295(2) K                                                      |                  |
| Wavelength                        | 1.54186 Å                                                     |                  |
| Crystal system                    | Monoclinic                                                    |                  |
| Space group                       | P 21/n                                                        |                  |
| Unit cell dimensions              | a = 10.2318(2) Å                                              | α = 90°.         |
|                                   | b = 14.1437(3) Å                                              | β = 102.589(3)°. |
|                                   | c = 16.3407(4) Å                                              | γ = 90°.         |
| Volume                            | 2307.90(9) Å <sup>3</sup>                                     |                  |
| Z                                 | 4                                                             |                  |
| Density (calculated)              | 1.351 Mg/m <sup>3</sup>                                       |                  |
| Absorption coefficient            | 0.777 mm <sup>-1</sup>                                        |                  |
| F(000)                            | 984                                                           |                  |
| Theta range for data collection   | 4.178 to 68.269°.                                             |                  |
| Index ranges                      | -12 ≤ h ≤ 8, -13 ≤ k ≤ 17, -16 ≤ l ≤ 19                       |                  |
| Reflections collected             | 17339                                                         |                  |
| Independent reflections           | 4170 [R(int) = 0.1830]                                        |                  |
| Completeness to theta = 67.686°   | 99.4 %                                                        |                  |
| Refinement method                 | Full-matrix least-squares on F <sup>2</sup>                   |                  |
| Data / restraints / parameters    | 4170 / 0 / 322                                                |                  |
| Goodness-of-fit on F <sup>2</sup> | 0.893                                                         |                  |
| Final R indices [I > 2σ(I)]       | R1 = 0.0632, wR2 = 0.1619                                     |                  |
| R indices (all data)              | R1 = 0.0925, wR2 = 0.1766                                     |                  |
| Largest diff. peak and hole       | 0.308 and -0.311 e. Å <sup>-3</sup>                           |                  |

**Table S2. Crystal data and structure refinement for compound 6.**

|                                   |                                                                 |                  |
|-----------------------------------|-----------------------------------------------------------------|------------------|
| Identification code               | fve498_3                                                        |                  |
| Empirical formula                 | C <sub>34</sub> H <sub>29</sub> N <sub>3</sub> O <sub>7</sub> S |                  |
| Formula weight                    | 623.66                                                          |                  |
| Temperature                       | 295(2) K                                                        |                  |
| Wavelength                        | 1.54186 Å                                                       |                  |
| Crystal system                    | Monoclinic                                                      |                  |
| Space group                       | P 21/c                                                          |                  |
| Unit cell dimensions              | a = 17.7403(4) Å                                                | α = 90°.         |
|                                   | b = 9.93690(10) Å                                               | β = 116.337(2)°. |
|                                   | c = 18.9331(5) Å                                                | γ = 90°.         |
| Volume                            | 2991.15(12) Å <sup>3</sup>                                      |                  |
| Z                                 | 4                                                               |                  |
| Density (calculated)              | 1.385 Mg/m <sup>3</sup>                                         |                  |
| Absorption coefficient            | 1.430 mm <sup>-1</sup>                                          |                  |
| F(000)                            | 1304                                                            |                  |
| Theta range for data collection   | 4.695 to 68.608°.                                               |                  |
| Index ranges                      | -18 ≤ h ≤ 21, -11 ≤ k ≤ 6, -22 ≤ l ≤ 21                         |                  |
| Reflections collected             | 22548                                                           |                  |
| Independent reflections           | 5436 [R(int) = 0.0676]                                          |                  |
| Completeness to theta = 67.686°   | 99.1 %                                                          |                  |
| Refinement method                 | Full-matrix least-squares on F <sup>2</sup>                     |                  |
| Data / restraints / parameters    | 5436 / 0 / 410                                                  |                  |
| Goodness-of-fit on F <sup>2</sup> | 0.914                                                           |                  |
| Final R indices [I > 2σ(I)]       | R1 = 0.0501, wR2 = 0.1264                                       |                  |
| R indices (all data)              | R1 = 0.0818, wR2 = 0.1376                                       |                  |
| Extinction coefficient            | 0.0017(2)                                                       |                  |
| Largest diff. peak and hole       | 0.902 and -0.287 e. Å <sup>-3</sup>                             |                  |
